# Neonatal morphometric similarity mapping for predicting brain age and characterizing neuroanatomic variation associated with preterm birth

Paola Galdi<sup>a,1,\*</sup>, Manuel Blesa<sup>a,1</sup>, David Q. Stoye<sup>a</sup>, Gemma Sullivan<sup>a</sup>, Gillian J. Lamb<sup>a</sup>, Alan J. Quigley<sup>b</sup>, Michael J. Thrippleton<sup>c,d</sup>, Mark E. Bastin<sup>c</sup>, James P. Boardman<sup>a,c</sup>

<sup>a</sup>MRC Centre for Reproductive Health, University of Edinburgh, Edinburgh EH16 4TJ, UK

<sup>b</sup>Department of Radiology, Royal Hospital for Sick Children, Edinburgh EH9 1LF, UK

<sup>c</sup>Centre for Clinical Brain Sciences, University of Edinburgh, Edinburgh EH16 4SB, UK

<sup>d</sup>Edinburgh Imaging, University of Edinburgh, Edinburgh EH16 4SB, UK

---

## Abstract

Multi-contrast MRI captures information about brain macro- and micro-structure which can be combined in an integrated model to obtain a detailed “fingerprint” of the anatomical properties of an individual’s brain. Inter-regional similarities between features derived from structural and diffusion MRI, including regional volumes, diffusion tensor metrics, neurite orientation dispersion and density imaging measures, can be modelled as morphometric similarity networks (MSNs). Here, individual MSNs were derived from 105 neonates (59 preterm and 46 term) who were scanned between 38 and 45 weeks postmenstrual age (PMA). Inter-regional similarities were used as predictors in a regression model of age at the time of scanning and in a classification model to discriminate between preterm and term infant brains. When tested on unseen data, the regression model predicted PMA at scan with a mean absolute error of  $0.70 \pm 0.56$  weeks, and the classification model achieved 92% accuracy. We conclude that MSNs predict chronological brain age accurately; and they provide a data-driven approach to identify networks that characterise typical maturation and those that contribute most to neuroanatomic variation associated with preterm

---

\*Correspondence: Paola Galdi, Queen’s Medical Research Institute, 47 Little France Crescent, Edinburgh EH16 4TJ, UK. Email: [paola.galdi@ed.ac.uk](mailto:paola.galdi@ed.ac.uk)

<sup>1</sup>These authors contributed equally to the work.

birth.

*Keywords:* morphometric similarity networks, preterm, developing brain, brain age, multi-modal data, MRI

---

## Highlights

1. Multiple MRI features are integrated in a single model to study brain maturation in newborns.
2. Morphometric similarity networks (MSNs) provide a whole-brain description of the structural properties of neonatal brain.
3. The information encoded in MSNs is predictive of chronological brain age in the perinatal period.
4. MSNs provide a novel data-driven method for investigating neuroanatomic variation associated with preterm birth.

## 1. Introduction

Preterm birth is closely associated with increased risk of neurodevelopmental, cognitive and psychiatric impairment that extends across the life course (Nosarti et al., 2012; Anderson, 2014; Mathewson et al., 2017; Van Lieshout et al., 2018). Structural and diffusion MRI (sMRI and dMRI) support the conceptualisation of atypical brain growth after preterm birth as a process characterised by micro-structural alteration of connective pathways due to impaired myelination and neuronal dysmaturation (Boardman et al., 2006; Anjari et al., 2007; Counsell et al., 2008; Ball et al., 2013b; Back and Miller, 2014; Van Den Heuvel et al., 2015; Eaton-Rosen et al., 2015; Thompson et al., 2016; Batalle et al., 2017; Telford et al., 2017; Batalle et al., 2018); this leads to a “dysconnectivity phenotype” that could form the basis for long term functional impairment (Boardman et al., 2010; Caldinelli et al., 2017; Keunen et al., 2017; Cao et al., 2017; Batalle et al., 2018b). However, there has not been a unified approach that incorporates information from sMRI and dMRI to study brain maturation

16 in the perinatal period so the set of image features that best capture brain  
17 maturation, and support image classification, are unknown.

18 The majority of neonatal connectomics studies have used single modes of  
19 data such as dMRI tractography (Brown et al., 2014; Bataille et al., 2017; Blesa  
20 et al., 2019) or resting-state functional connectivity (Ball et al., 2016; Smyser  
21 et al., 2016a). An alternative connectome model is the structural covariance  
22 network (SCN) approach (Alexander-Bloch et al., 2013) in which covariance be-  
23 tween regional measurements is calculated across subjects, resulting in a single  
24 network for the entire population. Other approaches have constructed subject-  
25 specific SCNs (Li et al., 2017; Mahjoub et al., 2018) or higher order morpho-  
26 logical networks to model the relationship between ROIs across different views  
27 (Soussia and Reikik, 2018), but these techniques have been restricted to the use  
28 of morphometric variables available through standard structural T1-weighted  
29 MRI sequences and by using a single metric (e.g. cortical thickness) to assess  
30 the “connectivity” between nodes (Shi et al., 2012).

31 Based on observations that integrating data from different MRI sequences  
32 enhances anatomic characterization (Melbourne et al., 2014; Kulikova et al.,  
33 2015; Ball et al., 2017; Thompson et al., 2018a), we investigated whether whole-  
34 brain structural connectomes derived from multi-modal data within a prediction  
35 framework can capture novel information about perinatal brain development.  
36 We used morphometric similarity networks (MSNs) to model inter-regional cor-  
37 relations of multiple macro- and micro-structural multi-contrast MRI variables  
38 in a single individual. This approach was originally devised to study how hu-  
39 man cortical networks underpin individual differences in psychological functions  
40 (Seidlitz et al., 2018), and we adapted it to describe both cortical and subcor-  
41 tical regions in the developing brain. The method works by computing for  
42 each region of interest (ROI) a number of metrics derived from different MRI  
43 sequences which are arranged in a vector. The aim is to obtain a multidimen-  
44 sional description of the structural properties of the ROIs. The MSN is then  
45 built considering the ROIs as nodes and modelling connection strength as the  
46 correlation between pairs of ROI vectors, thus integrating in a single connectome

47 the ensemble of imaging features. The pattern of inter-regional correlations can  
48 be conceptualised as a “fingerprint” of an individual’s brain.

49 We investigated the utility of MSNs for describing brain maturation, and  
50 for patient classification. The edges of individual MSNs were used to train two  
51 predictive models: a regression model to predict postmenstrual age (PMA) at  
52 scan and identify the set of image features that best model chronological brain  
53 age; and a classification model to discriminate between preterm infants at term  
54 equivalent age and term neonates, and thereby identify the networks that explain  
55 neuroanatomic variation associated with preterm birth. We hypothesized that  
56 predictive models based on MSNs, which integrate information from multiple  
57 data modalities, would outperform models based on single metrics and single  
58 data modalities.

## 59 **2. Material and methods**

### 60 *2.1. Participants and data acquisition*

61 Participants were recruited as part of a longitudinal study designed to in-  
62 vestigate the effects of preterm birth on brain structure and long term out-  
63 come. The study was conducted according to the principles of the Declaration  
64 of Helsinki, and ethical approval was obtained from the UK National Research  
65 Ethics Service. Parents provided written informed consent. One hundred and  
66 twelve neonates underwent MRI at term equivalent age at the Edinburgh Imag-  
67 ing Facility: Royal Infirmary of Edinburgh, University of Edinburgh, UK, and  
68 105 had multi-modal imaging suitable for MSN analysis (7 acquisitions did not  
69 yield usable datasets across all modalities due to motion or wakefulness during  
70 one or more sequences). The study group contained 46 term and 59 preterm  
71 infants (details are provided in Table 1). The distribution of PMA at scan for all  
72 participants, for the term and preterm groups, and the distribution by gender  
73 are shown in Fig. 1. Of the preterm infants, 12 had bronchopulmonary dyspla-  
74 sia, 3 had necrotising enterocolitis and 3 required treatment for retinopathy of  
75 prematurity.

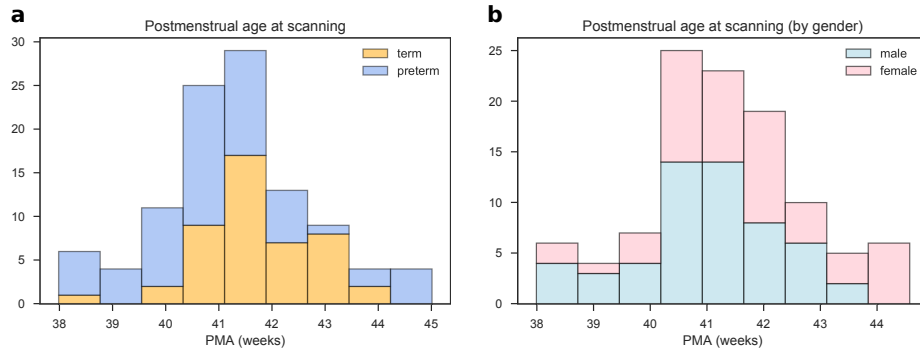

Figure 1: Distribution of postmenstrual age at scan for all subjects. a) Age distribution for the for term (blue) and preterm (orange) groups. b) Age distribution for male (blue) and female (pink) participants.

Table 1: Participant characteristics. The last column reports the  $p$  values of the group differences computed with the Wilcoxon rank-sum test for continuous variables and with the chi-squared test for categorical variables.

|                      | preterm (N=59) | term (N=46) | all (N=105) | preterm vs. term           |
|----------------------|----------------|-------------|-------------|----------------------------|
| PMA at birth (weeks) | 23.42-32.00    | 37.00-42.00 | 23.42-42.00 | $p = 1.88 \times 10^{-18}$ |
| Birth weight (grams) | 454-2100       | 2556-4560   | 454-4560    | $p = 1.93 \times 10^{-18}$ |
| PMA at scan (weeks)  | 38.00-44.56    | 38.28-43.84 | 38.00-44.56 | $p = 0.0035$               |
| M:F ratio            | 29:30          | 26:20       | 55:50       | $p = 0.4532$               |

PMA = Postmenstrual age, M = male, F = female.

76 A Siemens MAGNETOM Prisma 3 T MRI clinical scanner (Siemens Health-  
77 care Erlangen, Germany) and 16-channel phased-array paediatric head coil were  
78 used to acquire: 3D T1-weighted MPRAGE (T1w) (acquired voxel size = 1mm  
79 isotropic) with TI 1100 ms, TE 4.69 ms and TR 1970 ms; 3D T2-weighted  
80 SPACE (T2w) (voxel size = 1mm isotropic) with TE 409 ms and TR 3200 ms;  
81 and axial dMRI. dMRI was acquired in two separate acquisitions to reduce the  
82 time needed to re-acquire any data lost to motion artefact: the first acquisition  
83 consisted of 8 baseline volumes ( $b = 0 \text{ s/mm}^2$  [b0]) and 64 volumes with  $b =$   
84  $750 \text{ s/mm}^2$ , the second consisted of 8 b0, 3 volumes with  $b = 200 \text{ s/mm}^2$ , 6  
85 volumes with  $b = 500 \text{ s/mm}^2$  and 64 volumes with  $b = 2500 \text{ s/mm}^2$ ; an op-  
86 timal angular coverage for the sampling scheme was applied (Caruyer et al.,

2013). In addition, an acquisition of 3  $b_0$  volumes with an inverse phase encoding direction was performed. All dMRI images were acquired using single-shot spin-echo echo planar imaging (EPI) with 2-fold simultaneous multislice and 2-fold in-plane parallel imaging acceleration and 2 mm isotropic voxels; all three diffusion acquisitions had the same parameters (TR/TE 3400/78.0 ms).

Infants were fed and wrapped and allowed to sleep naturally in the scanner. Feeds were timed to increase the likelihood of post-prandial sleep, flexible earplugs and neonatal earmuffs (MiniMuffs, Natus) were used for acoustic protection, and a soothing environment was created in terms of light and noise. Pulse oximetry, electrocardiography and temperature were monitored. All scans were supervised by a doctor or nurse trained in neonatal resuscitation. Each acquisition was inspected contemporaneously for motion artefact and repeated if there had been movement but the baby was still sleeping; dMRI acquisitions were repeated if signal loss was seen in 3 or more volumes. The majority of the cohort had one or more sequences repeated in order to acquire the best possible quality data for processing.

Conventional images were reported by an experienced paediatric radiologist (A.J.Q.) using a structured system (Leuchter et al., 2014; Woodward et al., 2006), and none of the images included in the final sample ( $N = 105$ ) showed evidence of focal parenchymal injury (defined as post-haemorrhagic ventricular dilatation, porencephalic cyst or cystic periventricular leukomalacia), or central nervous system malformation.

## 2.2. Data preprocessing

All the following preprocessing steps, including maps calculation and quality check, were performed using dcm2niix, FSL, MRtrix, MIRTk, ANTs, Connectome Workbench and cuDIMOT (Smith et al., 2004; Avants et al., 2011; Marcus et al., 2011; Makropoulos et al., 2014; Li et al., 2016; Hernandez-Fernandez et al., 2019; Tournier et al., 2019).

First, all DICOM image files (dMRI and sMRI) were converted to NIFTI (Li et al., 2016). Structural data were preprocessed using the developing Human

117 Connectome Project (dHCP) minimal structural processing pipeline for neona-  
118 tal data (Makropoulos et al., 2018). Briefly, the T1w image was co-registered  
119 to the T2w image, both were corrected for bias field inhomogeneities (Tustison  
120 et al., 2010) and an initial brain mask was created (Smith, 2002). Following this,  
121 the brain was segmented into different tissue types (CSF: cerebrospinal fluid;  
122 WM: white matter; cGM: cortical grey matter; GM: subcortical grey matter)  
123 using the Draw-EM algorithm (Makropoulos et al., 2014). Twenty manually  
124 labelled atlases (Gousias et al., 2012) were then registered to each subject us-  
125 ing a multi-channel registration approach, where the different channels of the  
126 registration were the original intensity T2-weighted images and GM probability  
127 maps. These GM probability maps were derived from an initial tissue segmenta-  
128 tion, performed using tissue priors propagated through registration of a preterm  
129 probabilistic tissue atlas (Serag et al., 2012). The framework produces several  
130 output files, but for this study only the aligned T1w and the T2w images and  
131 the parcellation in 87 ROIs were used (Makropoulos et al., 2018). Note that  
132 from these 87 ROIs six were removed: the background, the unlabelled brain  
133 area (mainly internal capsule), the CSF, the lateral ventricles (left and right)  
134 and the corpus callosum (see section 2.4).

135 Diffusion MRI processing was performed as follows: for each subject the two  
136 dMRI acquisitions were first concatenated and then denoised using a Marchenko-  
137 Pastur-PCA-based algorithm (Veraart et al., 2016,b); the eddy current, head  
138 movement and EPI geometric distortions were corrected using outlier replace-  
139 ment and slice-to-volume registration with TOPUP and EDDY (Andersson  
140 et al., 2003; Smith et al., 2004; Andersson and Sotiropoulos, 2016; Andersson  
141 et al., 2016, 2017); bias field inhomogeneity correction was performed by calcu-  
142 lating the bias field of the mean b0 volume and applying the correction to all the  
143 volumes (Tustison et al., 2010). This framework only differs from the optimal  
144 pipeline for diffusion preprocessing presented in Maximov et al. (2019) in that  
145 we did not perform the final smoothing or the gibbs-ring removal (Kellner et al.,  
146 2016) due to the nature of the data (partial fourier space acquisition).

147 The mean b0 EPI volume of each subject was co-registered to their structural

148 T2w volume using boundary-based registration (Greve and Fischl, 2009), then  
149 the inverse transformation was used to propagate ROI labels to dMRI space,  
150 with a modified bbrslope parameter of 0.5, which is used for neonatal data  
151 (Toulmin et al., 2015).

152 For each ROI, two metrics were computed in structural space: ROI volume  
153 and the mean T1w/T2w signal ratio (Glasser and Van Essen, 2011). The other  
154 ten metrics were calculated in native diffusion space: five metrics derived from  
155 the diffusion kurtosis (DK) model (Jensen et al., 2005) and five derived from the  
156 Neurite Orientation Dispersion and Density Imaging model (NODDI) (Zhang  
157 et al., 2012; Tariq et al., 2016).

### 158 *2.3. Feature extraction*

#### 159 *2.3.1. Structural metrics*

160 ROI volumes were calculated without normalising for the whole brain vol-  
161 ume, as they are used only to compute inter-regional similarities within subjects.  
162 The mean T1w/T2w signal ratio was calculated before the bias field correction.  
163 The T1w/T2w ratio was used because it enhances myelin contrast and math-  
164 ematically cancels the signal intensity bias related to the sensitivity profile of  
165 radio frequency receiver coils (Glasser and Van Essen, 2011).

#### 166 *2.3.2. Diffusion kurtosis metrics*

167 The diffusion kurtosis (DK) model is an expansion of the diffusion tensor  
168 model. In addition to the diffusion tensor, the DK model quantifies the degree  
169 to which water diffusion in biological tissues is non-Gaussian using the kurtosis  
170 tensor. The reason for this is that the Gaussian displacement assumption un-  
171 derlying the diffusion tensor breaks at high b-values (Jensen et al., 2005). On  
172 the kurtosis component, we only focus on the mean value along all diffusion  
173 directions.

174 The metrics obtained from the DK model for each ROI are the means of: the  
175 fractional anisotropy (FA), mean, axial and radial diffusivity (MD, RD, AD) and  
176 kurtosis (MK). The MK map quantifies the deviation from Gaussianity of water



177 molecule displacement and can reflect different degrees of tissue heterogeneity  
178 (Steven et al., 2014).

### 179 *2.3.3. NODDI metrics*

180 We included NODDI metrics alongside the more commonly adopted diffu-  
181 sion tensor measures as previous studies have shown that NODDI indices are  
182 sensitive to underlying biological changes in the brain and provide more spe-  
183 cific microstructural characteristics, in agreement with histology (Grussu et al.,  
184 2017; Batalle et al., 2018).

185 For the NODDI measures, the Bingham distribution was employed (Tariq  
186 et al., 2016) as it allows extra flexibility by describing fibre dispersion along  
187 two orthogonal axes. From this NODDI implementation we obtain five metrics:  
188 intracellular volume fraction ( $v_{ic}$ ), isotropic volume fraction ( $v_{iso}$ ), the orien-  
189 tation dispersion index along the primary and secondary directions ( $ODI_P$  and  
190  $ODI_S$ ) and the overall orientation dispersion index ( $ODI_{TOT}$ ).

191 One limitation of this model is that it requires fixing a value for the diffu-  
192 sivity along the axons. However, optimal values for this parameter are region-  
193 dependent (Karmacharya et al., 2018) and the default value may be suboptimal  
194 for the neonatal population as it has been optimised using an adult cohort  
195 (Zhang et al., 2012; Karmacharya et al., 2018). Several studies have been re-  
196 porting NODDI values for neonates using default (or unspecified) parameters  
197 (Batalle et al., 2018; Bastiani et al., 2018; Karmacharya et al., 2018) or modi-  
198 fied ones (Kunz et al., 2014; Jelescu et al., 2015). As our goal was not to report  
199 NODDI values for the different areas, and because of the lack of reference val-  
200 ues for this population, we calculated NODDI maps using default parameters  
201 (Batalle et al., 2018).

### 202 *2.4. Data Quality Control*

203 The parcellations obtained after the processing were visually inspected and  
204 parcels corresponding to CSF and background parcels were excluded because  
205 they do not represent brain tissue. We observed a poor segmentation of the

206 corpus callosum in part of the subjects, but we did not find any anomalies in the  
207 rest of the parcels. This effect could be caused by different factors: a) this area  
208 is problematic to segment due to the proximity to CSF and its small thickness  
209 (see for example Otsuka et al. (2019)); b) the framework we used was optimised  
210 for the dHCP data that have a very high resolution ( $0.5 \text{ mm}^3$  isotropic) and  
211 data quality, making the partial volume effect more noticeable in data with  
212 a resolution of  $1 \text{ mm}^3$ ; c) or susceptibility artifacts. Instead of removing the  
213 subjects with a poor segmentation, we decided to remove the corpus callosum  
214 from the model, aiming at maximising the number of subjects. As a result of  
215 the whole quality check, we include the whole population ( $N = 105$ ) and each  
216 network is composed of 81 nodes (ROIs).

217 For the dMRI data we use eddy QC (Bastiani et al., 2019). The quality  
218 control is performed at subject level and group level. Eddy QC provides several  
219 measures related to the rotation, translation and outliers of the images. In ad-  
220 dition, it also computes the signal-to-noise (SNR) ratio maps of the  $b_0$  volumes  
221 and the contrast-to-noise (CNR) ratio maps for the different  $b$ -values. These  
222 maps can be used at group level to visualise the quality of the data (Bastiani  
223 et al., 2018). The results show that the overall quality of the data-set was good  
224 (Fig. 2). For eddy QC to work, we removed the  $b$ -value =  $200 \text{ s/mm}^2$  only  
225 from the quality control. This is because the low number of volumes with this  
226  $b$ -value sometimes leads the Gaussian process performed by eddy to produce a  
227 perfect fit, which makes the CNR maps unrealistic.

228 Fig. 2 shows two representative subjects, one from the top quartile of the  
229 SNR and CNR distributions (green star) and one from the bottom quartile (red  
230 star). In the first panel we can see where they are placed in terms of SNR and  
231 CNR over the overall population. The second panel shows the SNR maps (for  
232 the  $b_0$ ) and the CNR maps (for the rest of  $b$ -values). The bottom panel of the  
233 Fig. 2 shows the  $b_0$  before and after the processing of the selected subjects. It  
234 is possible to observe the effect of the different steps involved, such as the EPI  
235 geometric corrections or the bias field inhomogeneity correction. Supplementary  
236 Figs. S8 and S9 report the above results for the term and preterm population

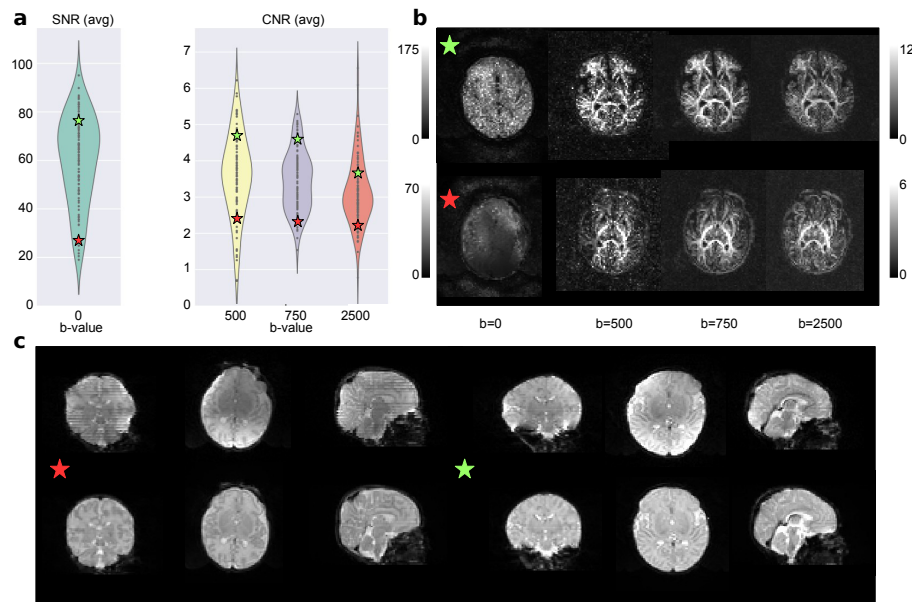

Figure 2: Quality control results. a) Results for the overall population with two selected subjects, one from the top quartile of the SNR and CNR distributions (green star) and the other from the bottom quartile (red star). b) The SNR and CNR maps for the selected subjects. c) The b0 of both subjects before and after the processing pipeline.

237 respectively.

238 Following Bastiani et al. (2019), for each volume, motion is quantified by  
239 averaging voxel displacement across all voxels (computed as 3 translations and  
240 3 rotations around the x, y and z axes). Absolute displacement is computed  
241 with respect to the reference volume, while relative displacement is computed  
242 with respect to the previous volume. A summary measure for each subject is  
243 calculated as the average (absolute or relative) displacement across all volumes.  
244 In Supplementary Fig. S10 we show the distribution of absolute and relative  
245 motion for the term and the preterm groups. We compared the distributions  
246 with a Wilcoxon rank-sum test and found no difference between the relative  
247 motion scores ( $W = 1330$ ,  $p = 0.43$ ) and a significant difference between the  
248 absolute motion scores ( $W = 1720$ ,  $p = 0.02$ ). However, as the violin plot  
249 shows, this difference is driven by the presence of outliers.

## 250 *2.5. Experimental design and statistical analysis*

251 The models and the analyses described in this section were implemented in  
252 Python (v3.6.4) using open source libraries and frameworks for scientific com-  
253 puting, including SciPy (v1.0.0), Numpy (v1.14.0), Statsmodels (v0.8.0), Pan-  
254 das (v0.22.0), Scikit-learn (v0.19.1) and Matplotlib (v2.1.2) (Jones et al., 2001;  
255 Hunter, 2007; Seabold and Perktold, 2010; McKinney et al., 2010; Pedregosa  
256 et al., 2011; Van Der Walt et al., 2011).

### 257 *2.5.1. Network Construction*

258 The MSN for each subject was constructed starting from 81 ROIs; each of the  
259 ROI metrics was normalised (z-scored) and Pearson correlations were computed  
260 between the vectors of metrics from each pair of ROIs. In this way, the nodes of  
261 each network are the ROIs and the edges represent the morphometric similarity  
262 between the two related ROIs (Fig. 3). In the following, the terms “edge”,  
263 “connection” and “inter-regional similarity” are used interchangeably to refer  
264 to the correlation between the regional metrics of a pair of ROIs.

### 265 *2.5.2. Confounding variables*

266 Early exposure to the extrauterine environment due to preterm birth ex-  
267 poses infants to several processes that are known to impact brain maturation  
268 (e.g. specific co-morbidities such as bronchopulmonary dysplasia and necrotis-  
269 ing enterocolitis (Barnett et al., 2018)), and other processes and diseases that  
270 can modify brain maturation (for example gestational age at birth, chorioam-  
271 nionitis, fetal growth restriction, nutritional insufficiency, pain and medication  
272 exposures (Duerden et al., 2016; Anblagan et al., 2016; Barnett et al., 2018;  
273 Schneider et al., 2018; Duerden et al., 2018; Blesa et al., 2019)). In addition,  
274 there may be as yet unknown environmental risks to brain structural connec-  
275 tivity and genomic and epigenomic factors may interact with gestational age at  
276 birth to confer risk (Batalle et al., 2017, 2018b; Boardman et al., 2014; Sparrow  
277 et al., 2016; Krishnan et al., 2017). Therefore, it is not possible to define a  
278 preterm infant cohort without any exposures to processes that could influence

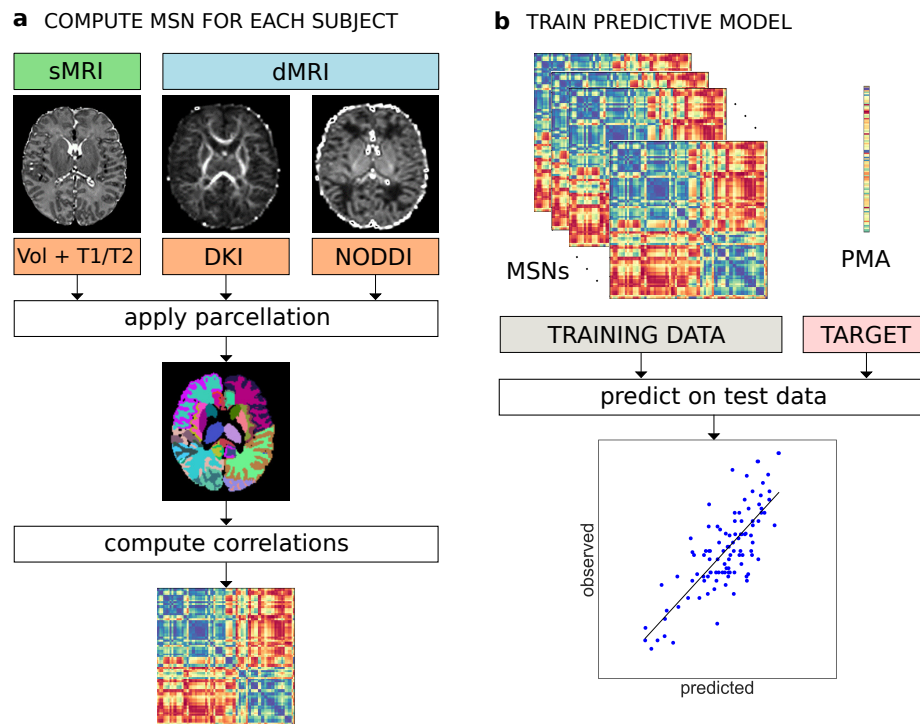

Figure 3: a) Individual MSN construction. Different metrics are extracted from dMRI and sMRI data. The same parcellation is applied to all image types and the average metric values are computed for each ROI. A MSN (represented here as a connectivity matrix) is built by computing the Pearson correlation between the vectors of metrics of each pair of ROIs. b) Training of a predictive model (here for PMA at scan) from individual MSNs. The inter-regional correlations are used as predictor variables in a machine learning model. The performance of the model is evaluated on an independent test set.

279 brain maturation. As our intention was to develop an integrated approach for  
280 characterising dysmaturation in a study group representative of the target pop-  
281 ulation, rather than to investigate possible drivers of dysmaturation, we did not  
282 control for any of the above factors.

283 We did however find that the preterm group was characterised by higher in-  
284 scanner motion than the term-group, hence we considered absolute displacement  
285 as a confounder (section 2.4). We also observed a positive correlation ( $\rho =$   
286  $0.27, p = 0.0048$ ) between PMA at scan and PMA at birth and a negative  
287 correlation ( $\rho = -0.22, p = 0.0233$ ) between PMA at scan and gender (coded as  
288 a binary variable where 0 indicates female infants and 1 male infants), implying  
289 that in our sample term subjects and female subjects tend to have their scan  
290 acquired at a later age (see also fig. 1). To control for potential bias, we  
291 used these confounders as predictors and compared their predictive performance  
292 with our network-based features. We tested the interaction between gender and  
293 prematurity in a linear regression model of PMA at scan, but the interaction  
294 term was not significant ( $p = 0.9634$ ). Birthweight was not included explicitly  
295 as a confounder due to its collinearity with PMA at birth.

### 296 *2.5.3. Regression model for age*

297 We trained a linear regression model with elastic net regularisation to pre-  
298 dict PMA at scan – i.e. chronological brain age – in both preterm and term  
299 infants starting from individual MSNs. This model was chosen for its ability to  
300 cope with a high number of features (Zou and Hastie, 2005). For each subject,  
301 the edges of the MSN (inter-regional correlations) were concatenated to form a  
302 feature vector to be given as input to the regression model. Since the connec-  
303 tivity matrix representing the MSN is symmetric, we considered only the upper  
304 triangular matrix for each subject. Gender and age at birth were included in the  
305 model to control for their possible confounding effects. The prediction perfor-  
306 mances were evaluated with a leave-one-out cross-validation (LOOCV) scheme,  
307 by computing the mean absolute error (MAE) averaged across subjects. Within  
308 each fold of the LOOCV, the parameters of the elastic net were selected with

309 a nested 3-fold cross-validation loop; the folds were stratified in percentiles to  
310 include samples covering the whole age range in each of the folds. Permutation  
311 testing was used for the statistical validation of the model performance: the null  
312 distribution was built by running the age prediction analysis on 1000 random  
313 permutation of the PMA.

#### 314 *2.5.4. Classification model*

315 A Support Vector Machine (SVM) classifier with linear kernel was trained  
316 to discriminate between preterm and term infants. As per the regression model,  
317 the input for each subject consisted of inter-regional connections taken from the  
318 upper triangular connectivity matrix and the performances were evaluated with  
319 LOOCV. Age at the time of scanning, gender and motion were included as ad-  
320 ditional covariates. While in the case of regression the elastic net regularisation  
321 performs automatically a variable selection step, recursive feature elimination  
322 (RFE) was applied in combination with SVM to select the best subset of con-  
323 nections. Model selection was implemented using nested cross validation: an  
324 outer 3-fold cross-validation loop was used to select the SVM parameters and  
325 an inner 4-fold cross-validation loop was used for RFE. Folds were stratified to  
326 include the same proportion of term and preterm subjects. The accuracy of  
327 the model was computed as the number of correctly classified subjects across  
328 the leave-one-out folds over the total number of subjects in the test set. The  
329 null distribution was built by repeating the exact same analysis 1000 times after  
330 randomly assigning subjects to the term and the preterm group.

#### 331 *2.5.5. Feature selection*

332 After the preprocessing phase, twelve different metrics were available for each  
333 ROI. To study which combination of features produced better performance in  
334 the prediction tasks, we implemented a sequential backward-forward feature  
335 selection scheme. Starting from the full set of features, at each iteration we  
336 compare the performances of different models built by removing in turn each of  
337 the features from the current set of candidate features. We then exclude from

338 the next iteration the feature whose subtraction caused the least increase in  
339 prediction error (down to three features, for a total of 73 combinations). The  
340 rationale behind this scheme is to explore the space of possible models without  
341 enumerating all possible solutions, thus reducing the computational demands  
342 compared to an exhaustive search. The procedure was performed separately for  
343 the regression and the classification models.

#### 344 *2.5.6. Cross-validation strategy*

345 We adopted LOOCV to select the best performing model in both the age  
346 prediction and the classification tasks as this scheme enabled maximum size  
347 of the training set and therefore best use of available data, but this strategy  
348 might induce high variance in the estimation of prediction accuracy (Kohavi,  
349 1995; Efron, 1983). In the context of brain decoding (i.e. predictions from  
350 brain images or signals), LOOCV was shown to produce overly optimistic esti-  
351 mates of prediction accuracy in the within-subject setting (i.e. when all sam-  
352 ples are highly correlated because they come from the same subject). In the  
353 between-subject setting (as in this work), the performance of LOOCV is sim-  
354 ilar to schemes involving random splits and mostly determined by sample size  
355 (Varoquaux et al., 2017; Varoquaux, 2018). To assess the stability of our results  
356 with respect to the chosen cross-validation scheme, we report the prediction  
357 accuracy computed with a 10 repeated stratified 5-fold scheme (10-5-fold) for  
358 all the models selected with LOOCV.

#### 359 *2.5.7. Comparison with individual metrics and single data modalities models*

360 We compared the performances of the best performing models based on  
361 MSNs with three classes of baseline models: a) models based on single global  
362 brain metrics (total brain volume and median FA in the WM); b) models based  
363 on individual metrics, where instead of similarities, predictors are the concate-  
364 nation of all regional values for each of the individual metrics used to build  
365 MSNs; c) single data modality MSNs, i.e. models built on structural features  
366 only (Volume and T1/T2), on DKI features only, and on NODDI features only.



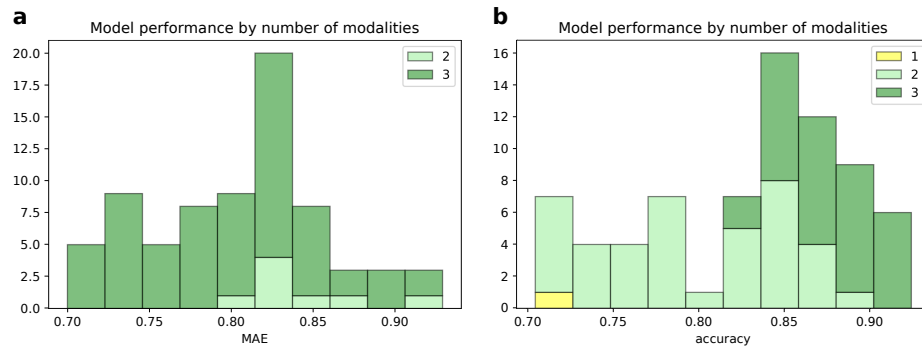

Figure 4: Histograms of the performance of the 73 models compared in the backward feature selection scheme for the age prediction task (a) and for the classification task (b). Bars are grouped by the number of modalities included in the models.

## 367 2.6. Data and code availability

368 Source code implementing the methods described in this paper is available  
369 upon request to the corresponding author. The preprocessed and anonymised  
370 data used in the analyses can be requested through the Brains Image Bank  
371 (<https://www.brainsimagebank.ac.uk/>) (Job et al., 2017).

## 372 3. Results

### 373 3.1. Feature selection

374 In Fig. 4 we report two histograms summarising the LOOCV performance of  
375 the 73 different models compared per each task in the backward feature selection  
376 scheme. In both cases, we can observe that the models based on all three data  
377 modalities achieved better results in terms of prediction accuracy. The perfor-  
378 mances of each of the compared model are reported in Supplementary Figs. S1  
379 and S3 for the age prediction and for the classification models, respectively.

380 The best performing model for age prediction, which was adopted for all sub-  
381 sequent analyses, was based on seven features (Volume, FA, MD, AD, MK,  $v_{iso}$ ,  
382  $ODI_P$ ). Fig. 5a shows the average MSN matrix computed across all subjects for  
383 the selected set of features and the matrix of correlation between inter-regional  
384 similarities and PMA at scan across subjects. The average MSN matrix shows

385 four main blocks that correspond roughly to positive correlations between ROIs  
386 within GM and between ROIs within WM, and to negative correlation between  
387 WM ROIs and GM ROIs, indicating that ROIs within GM (and within WM)  
388 share similar structural properties, while GM and WM regional descriptors tend  
389 to be anti-correlated. The four-block structure is recognisable also in the matrix  
390 reporting correlations with chronological age: with increasing age regions within  
391 GM or within WM become more similar with each other, while the dissimilarities  
392 between GM and WM ROIs increases.

393 The best classifier model was based on eleven out of the twelve features (all  
394 except  $ODI_S$ ), so compared to the age prediction model, four additional features  
395 were included: T1/T2, RD,  $v_{ic}$  and  $ODI_{TOT}$ . The average MSN computed with  
396 the selected features and the matrix of correlation with PMA at birth is shown  
397 in Fig. 5 (panels b and c). Comparing panel b and d of Fig. 5, it is apparent  
398 that while the patterns of correlation with PMA at scan and at birth are similar  
399 within GM and WM, subcortical ROIs show an opposite trend: with increasing  
400 PMA at scan subcortical ROIs tend to become more similar to WM ROIs and  
401 more dissimilar to GM ROIs, but the similarity between subcortical ROIs and  
402 cortical GM is positively correlated to age at birth.

### 403 3.2. Prediction results

404 The best regression model selected with LOOCV predicted chronological age  
405 (PMA at scan) with a MAE of  $0.70 \pm 0.56$  weeks on the test data, and a corre-  
406 lation between the predicted and the actual age equal to  $r = 0.78$  ( $p = 1.71 \times$   
407  $10^{-22}$ ) (Supplementary Fig. S5). The results of the permutation test are shown  
408 in Fig. 6 and Supplementary Fig. S6. The confounding variables (gender and  
409 age at birth) were not selected by the internal feature selection procedure, hence  
410 the predictions were based on network features alone. To test whether there  
411 was any systematic difference in the predicted age between the term and the  
412 preterm group, we compared the error distributions with a Wilcoxon rank-sum  
413 test, but the result was not significant ( $W = 1108$ ,  $p = 0.1085$ ). For compari-  
414 son, we evaluated the predictive performance of a linear regression model using

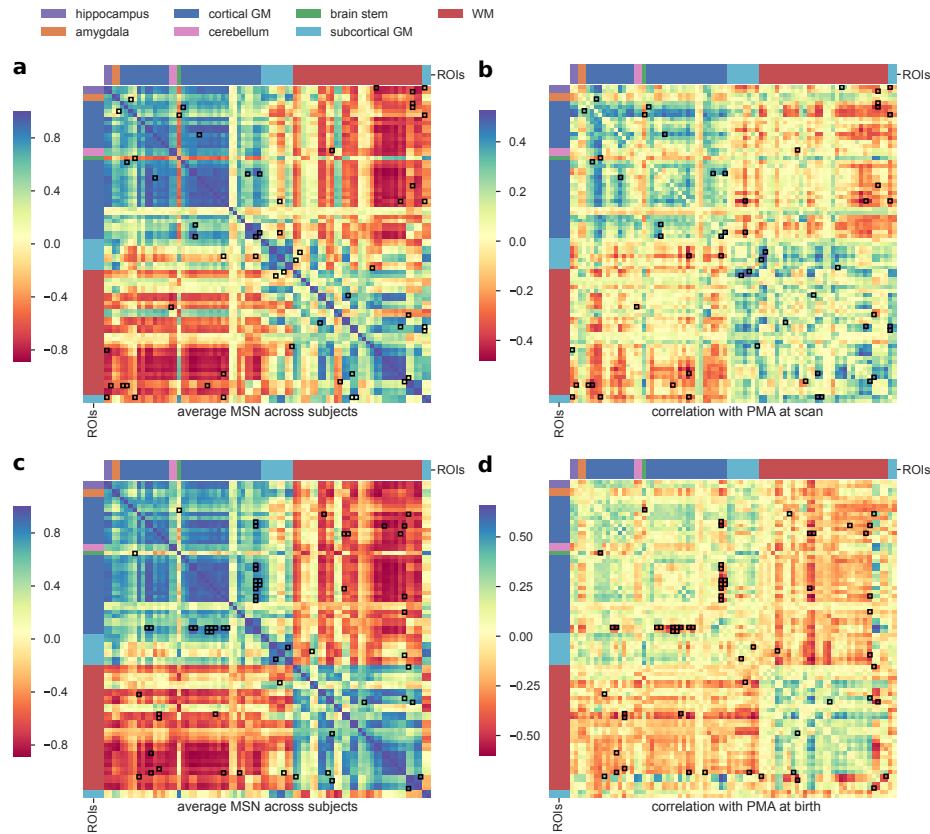

Figure 5: a) Average MSN computed across all subjects using the combination of features selected through the backward feature selection scheme for the age prediction task (Volume, FA, MD, AD, MK,  $v_{iso}$ ,  $ODI_P$ ). b) Correlation between each connection weight (inter-regional similarity) shown in (a) and PMA at scan across subjects. c) Average MSN computed across all subjects using the combination of features selected through the backward feature selection scheme for the classification task (Volume, T1/T2, FA, MD, AD, RD, MK,  $v_{ic}$ ,  $v_{iso}$ ,  $ODI_P$ ,  $ODI_{TOT}$ ). d) Correlation between each connection weight (inter-regional similarity) shown in (c) and PMA at birth across subjects. Connections that were identified as predictive features by the models are highlighted in black. ROIs are ordered as in Supplementary Table S1.

415 only gender and PMA at birth as independent variables, that achieved a MAE  
416 of  $1.03 \pm 0.88$  weeks. A Wilcoxon signed-rank test confirmed that the latter  
417 model achieved a significantly greater error ( $W = 1633$ ,  $p = 0.0001$ ). Also mod-  
418 els based on single global metrics and single-modality MSNs models provided  
419 poorer predictive performance than the selected multi-modality MSNs model  
420 (brain volume: MAE=  $0.93 \pm 0.68$ ,  $R = 0.58$ ; median FA: MAE=  $0.88 \pm 0.63$ ,  
421  $R = 0.58$ ; structural: MAE=  $1.08 \pm 0.79$ ,  $R = 0.32$ ; DKI: MAE=  $0.94 \pm 0.70$ ,  
422  $R = 0.57$ ; NODDI: MAE=  $0.88 \pm 0.69$ ,  $R = 0.61$ ) and this was confirmed by  
423 a Wilcoxon signed-rank test (brain volume:  $W = 1813$ ,  $p = 0.0019$ ; median  
424 FA:  $W = 2045$ ,  $p = 0.0184$ ; structural:  $W = 1361$ ,  $p = 2.76 \times 10^{-06}$ ; DKI:  
425  $W = 1734$ ,  $p = 0.0004$ ; NODDI:  $W = 1811$ ,  $p = 0.0009$ ). Conversely, the  
426 baseline model based on the ensemble on individual metrics used to build the  
427 best performing MSN model achieved similar performances (MAE:  $0.72 \pm 0.56$ ,  
428  $R = 0.77$ ). A scatter plot of the residuals of the two models (Supplementary  
429 Fig. S11) showed a linear trend, indicating that the two models share a similar  
430 information content.

431 Supplementary Fig. S2 shows the results computed with 10-5-fold cross-  
432 validation in. All compared models performed similarly under the 10-5-fold  
433 scheme, and in general worse than with the LOOCV scheme, with the selected  
434 model achieving a MAE of  $1 \pm 0.2$  weeks (Supplementary Fig. S7).

435 To study which connections contributed the most to chronological age pre-  
436 diction, we selected only edges which were assigned a non-zero coefficient in at  
437 least 99% of cross-validation folds. These edges are shown in the chord diagram  
438 in Fig. 7 (realised with Circos, Krzywinski et al. (2009)), and are colour coded  
439 to distinguish between inter-regional similarities that increase or decrease with  
440 age, to highlight networks of regions whose morphological properties are con-  
441 verging (gray) or that tend to differentiate with increasing age (red). Intuitively,  
442 these edges connect ROIs whose anatomical and micro-structural properties are  
443 changing more than others between 38 and 45 weeks PMA, making the ROIs  
444 more or less similar. In other words, it is the relative timing of maturation  
445 of different brain tissues to determine the relevance of a connection in the age

446 prediction task. The selected connections are located in both cortical (frontal,  
447 temporal, parietal and occipital lobes; insular and posterior cingulate cortex)  
448 and subcortical regions (thalamus, subthalamic and lentiform nuclei), in the  
449 brain stem and in the cerebellum. These areas have been previously associated  
450 with age-related changes and preterm birth (Boardman et al., 2006; Ball et al.,  
451 2013a; Bataille et al., 2017). For comparison, we report in Supplementary Table  
452 S2 the regional metrics selected as most predictive of age in the baseline model  
453 based on individual metrics.

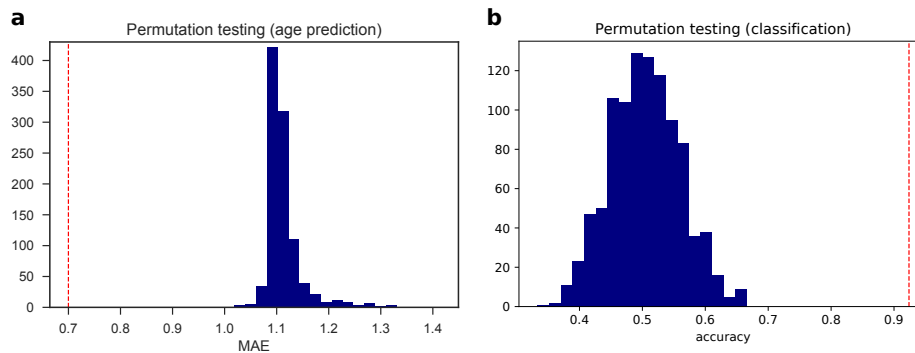

Figure 6: Null distributions computed over 1000 random permutations of the target variable for the age prediction (a) and the classification tasks (b). The red dotted lines indicate the performances of our models.

454 The best classifier discriminated between term and preterm infants with a  
455 92% LOOCV accuracy (Fig. 6). None of the confounders were included among  
456 the selected features. A logistic regression model built on age at scan and gender  
457 did not achieve significant accuracy (56%,  $p = 0.091$ ), while adding motion to  
458 the predictors produced a 61% accuracy, slightly above chance level ( $p = 0.03$ ),  
459 but it should be noted that a model based on motion only was 59% accurate  
460 ( $p = 0.02$ ). Models based on global features achieved 55% accuracy for total  
461 brain volume and 56% accuracy for median FA. Models built on single data  
462 modalities attained 65% accuracy for structural features only, 89% accuracy  
463 for DKI features only, and 88% accuracy for NODDI features only. Results  
464 computed with 10-5-fold cross-validation are shown in Supplementary Fig. S4.

465 The best classifier selected with LOOCV also achieved top accuracy with 10-5-  
466 fold (accuracy 90%, Supplementary Fig. S7).

467 The network of regions that showed the most divergent pattern of structural  
468 brain properties in preterm versus term infants comprised the brain stem, the  
469 thalamus and the subthalamic nucleus; WM regions in the frontal and insu-  
470 lar lobes; GM regions in the occipital lobe; both WM and GM regions in the  
471 temporal and parietal lobes and in the posterior cingulate cortex. The chord  
472 diagram of edges selected by 99% of the models is shown in Fig. 8, in red where  
473 inter-regional similarities are greater in the term group and in gray where they  
474 are greater in the preterm group. For comparison, Supplementary Table S3 lists  
475 the regional metrics selected by the baseline model based on individual metrics,  
476 that obtained a 94% accuracy.

### 477 *3.3. Testing for asymmetry*

478 In both chord diagrams (Figs. 7 and 8) we observed more edges in the right  
479 hemisphere than in the left one. Both elastic net and SVM models perform a  
480 feature selection step to exclude features that are correlated and that carry re-  
481 dundant information in order to improve prediction performance, hence it might  
482 be the case that the models selected the right connections and discarded the  
483 left ones precisely because they had a similar information content. Additionally,  
484 in the leave-one-out cross-validation scheme the training sets only differ by two  
485 samples in each fold, hence models might be similar across folds.

486 To test the hypothesis that the two hemispheres carry a different information  
487 content, we performed two experiments. First, we repeated the same analyses  
488 extracting inter-regional similarities from either the right or the left hemisphere.  
489 We compared the performance obtained with the regression and classification  
490 models on the different subsets of features used in the backward feature se-  
491 lection scheme in the main analyses. We found that for the age prediction  
492 model a Wilcoxon signed-rank test testing the hypothesis that the prediction  
493 error was higher using only connections from the left hemisphere was significant  
494 ( $W = 156, p = 2.57 \times 10^{-11}$ ), while there was no statistically significant differ-

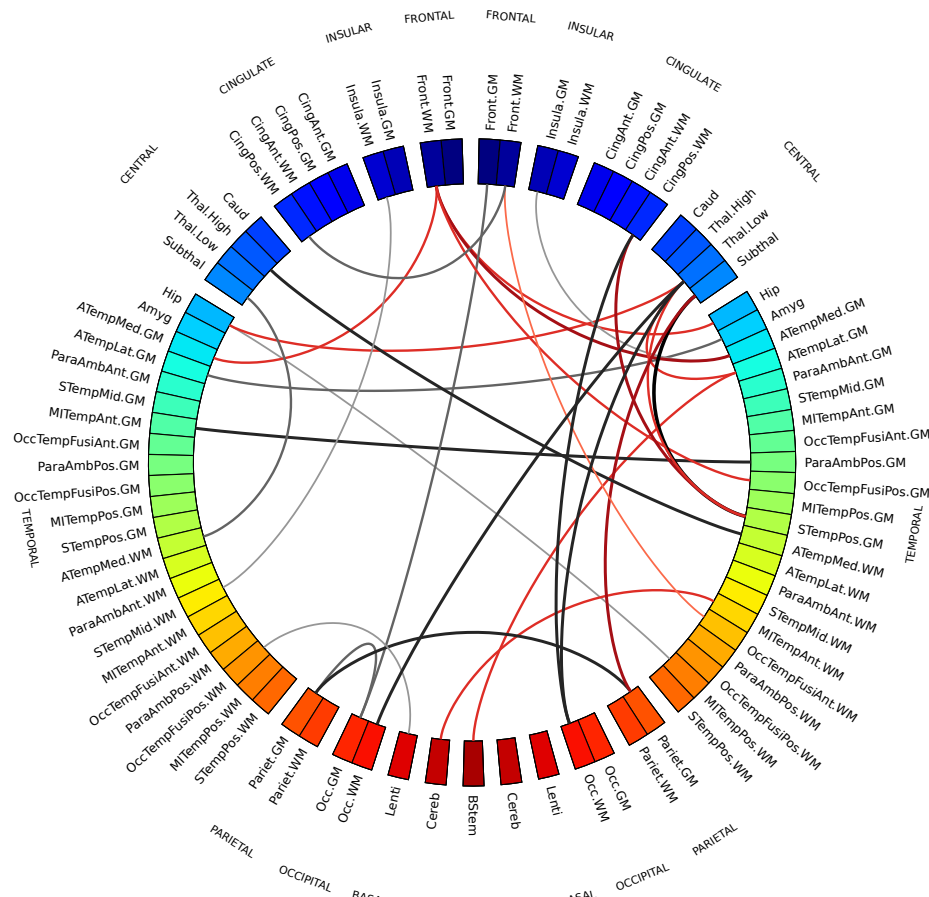

Figure 7: Chord diagram showing MSN edges used for age prediction in at least 99% of regression models in the cross-validation folds. Connections shown in gray are inter-regional similarities that increase with chronological age, while connections in red are inter-regional similarities that decrease with chronological age. The edge width is proportional to the correlation between inter-regional similarities and PMA. The left side of the diagram corresponds to the left side of the brain. Abbreviations for ROI names are explained in Supplementary Table S1.

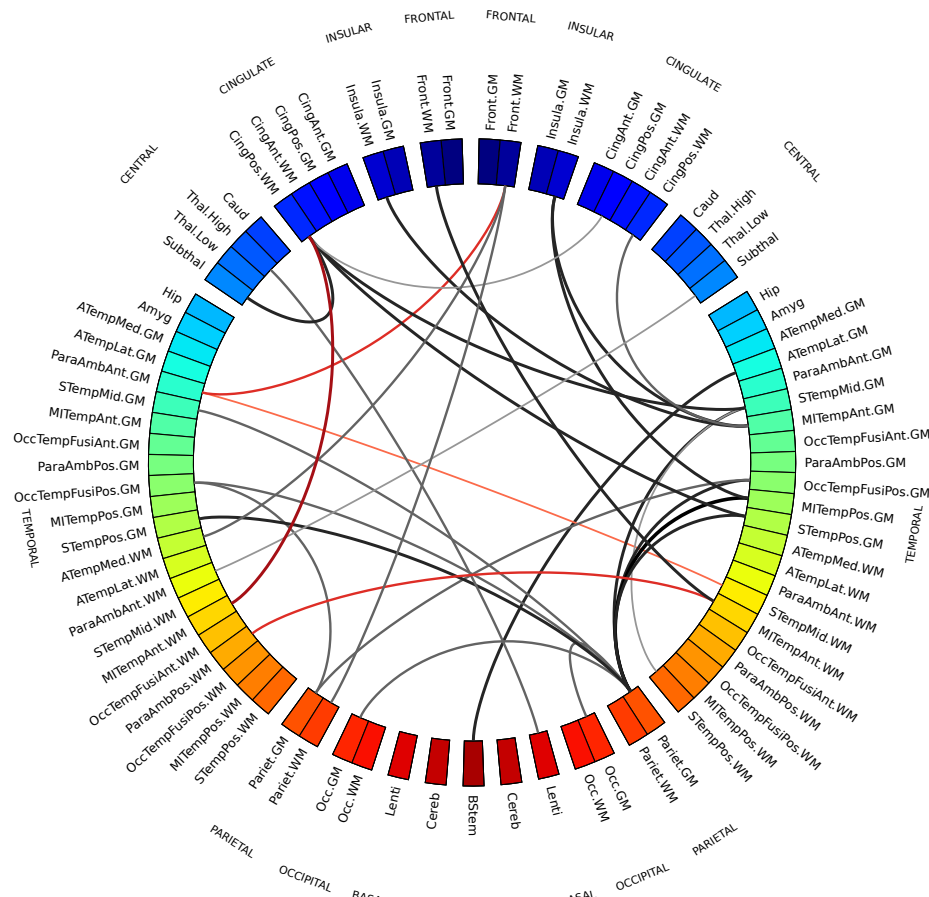

Figure 8: MSN edges showing a divergent pattern of morphological properties in term and preterm infants in at least 99% of classification models in the cross-validation folds. Gray connections indicate inter-regional similarities that are greater in the preterm group, while red connections are greater in the term group. The edge width is proportional to the correlation between inter-regional similarities and prematurity. The left side of the diagram corresponds to the left side of the brain. Abbreviations for ROI names are explained in Supplementary Table S1.



495 ence in the case of the classification model. These results replicated also when  
496 using 10-5-fold cross-validation (age prediction:  $W = 160$ ,  $p = 2.98 \times 10^{-11}$ ; no  
497 significant difference in classification). We also compared the residuals obtained  
498 using either the right or the left hemisphere for age prediction with the set  
499 of features selected with backward feature selection (Supplementary Fig. S11)  
500 and found that the residuals of the fitted models are linearly correlated, sug-  
501 gesting that the two hemispheres do carry a similar information content, but  
502 one presents clearer signal than the other. We then used permutation testing to  
503 test the “interchangeability” of right and left regions: starting from the subsets  
504 of imaging metrics selected in the main analyses for the age prediction and clas-  
505 sification models, we generated two null distributions by randomly swapping a  
506 subset of homotopic brain regions between the right and left hemisphere, and  
507 then repeating the exact same analyses 1000 times. We then counted how many  
508 times in the random models there was a disproportion of inter-regional similar-  
509 ities selected in the right hemisphere equal or greater than the one we observed  
510 with our models. If the right and left are “interchangeable”, the number of inter-  
511 regional similarities selected should remain the same on average. We found that  
512 in the age prediction task, under the null distribution, the disproportion of pre-  
513 dictive connections in the right hemisphere was associated with a  $p = 0.036$ ,  
514 while in the classification task the disproportion was not significant ( $p = 0.166$ ).  
515 This implies that at least for age prediction the two hemispheres are not inter-  
516 changeable, suggesting again that the right hemispheres has a stronger signal.  
517 A similar trend was observed under the 10-5-fold cross-validation scheme, but in  
518 this case we could not reject the null hypothesis that inter-regional similarities  
519 are selected with the same frequency from both hemispheres ( $p = 0.098$ ).

#### 520 **4. Discussion**

521 These results show that the information encoded in MSNs is predictive of  
522 chronological brain age in the neonatal period and that MSNs provide a novel  
523 data-driven method for investigating neuroanatomic variation associated with

524 preterm birth. MSNs were built by combining features from different imaging se-  
525 quences that describe complementary aspects of brain structure that have been  
526 previously studied in isolation (Makropoulos et al., 2016; Batalle et al., 2017)  
527 and the resulting predictive models achieved a high accuracy for age prediction  
528 and classification. By comparing the performance of MSNs features with basic  
529 demographic information (age at birth and gender) and simple metrics such as  
530 total brain volume and median white matter FA, we also showed that integrat-  
531 ing imaging data provides relevant additional information to characterise brain  
532 age. Although we cannot exclude the possibility that some of the variability  
533 shared with age at birth, gender or brain volume is encoded in the imaging vari-  
534 ables, the comparative analysis and the permutation testing results showed that  
535 the observed variance cannot be completely explained by demographic variables  
536 or simpler metrics alone. However, a high accuracy is not the only goal of the  
537 proposed method: once we have determined that the model is able to learn a  
538 relationship between the MSN features and age or prematurity, we can inter-  
539 rogate it to find out which features, regions and structures are involved in the  
540 predictions, thus allowing for further inferences.

541 We anticipate that the main clinical and research utilities of MSNs will be  
542 to investigate divergent maturational patterns in the context of perinatal envi-  
543 ronmental, genetic and clinical exposures, leading to improved understanding  
544 of antecedents to, and consequences of, atypical brain development. For these  
545 purposes a prediction tool with average 5 days error is highly precise compared  
546 with other methods for assessing brain maturation, which usually rely upon  
547 simple linear regression, use single image features, or broad classifications of  
548 prematurity (Toews et al., 2012; Brown et al., 2017; Batalle et al., 2018; Deprez  
549 et al., 2018; Bouyssi-Kobar et al., 2018; Ouyang et al., 2018).

550 The regions identified as most predictive have been previously associated  
551 with age-related changes and preterm birth (Boardman et al., 2006; Ball et al.,  
552 2013a; Batalle et al., 2017; Bouyssi-Kobar et al., 2018). These data suggest that  
553 to fully describe morphological variation in the developing brain it may be ad-  
554 vantageous to adopt a holistic approach, leveraging the additional information

555 that can be derived from integrating multi-contrast MRI data. The main moti-  
556 vation for using a network-based approach is to obtain a whole-brain description  
557 of a developmental pattern. By using topologically integrated features instead  
558 of single metrics it is possible to access an additional layer of information that  
559 is not explicitly encoded in the individual metrics, i.e. how the relationships  
560 between metrics vary in different parts of the brain. Working with correlations  
561 instead of an ensemble of heterogeneous metrics also aids interpretation, as the  
562 focus is shifted from the values of single metrics across the brain, each influ-  
563 enced by disparate factors, to similarities between brain regions, which is a more  
564 relatable concept. Additionally, the adoption of a network model has proven  
565 to be a useful abstraction to capture the modular organisation of the brain: in  
566 the original work introducing MSNs to study microscale cortical organization in  
567 adults, the authors demonstrated that regions that were similar in MSNs were  
568 more likely to belong to the same cytoarchitectonic class, to be axonally con-  
569 nected and to have high levels of co-expressions of genes specialised for neural  
570 functions (Seidlitz et al., 2018). Another reason for working with similarities  
571 instead of single regional metrics is methodological: computing edge weights as  
572 inter-regional similarities enables an integrated representation of several met-  
573 rics in a single network; to work with the original features directly would mean  
574 either working with several networks (thus requiring a further step to integrate  
575 them and aggravating the problems related with the “curse of dimensionality”)  
576 or concatenating all the features in a single predictive model (thus excluding  
577 the interactions between metrics from the model).

Table 2: Results from previous works in the age prediction task.

|                    | Age span              | Model                                                                              | Error/Accuracy                                           |
|--------------------|-----------------------|------------------------------------------------------------------------------------|----------------------------------------------------------|
| Brown et al. 2017  | 27-45 weeks PMA       | FA-weighted structural connectivity                                                | MAE = 1.6 weeks                                          |
| Ouyang et al. 2019 | 31.5-41.7 weeks PMA   | cortical FA and MK (mean kurtosis)                                                 | FA: $r = .92$ ; MK: $r = .63$                            |
| Deprez et al. 2018 | 29-44 weeks PMA       | spatio-temporal growth models for myelin-like signals in the thalami and brainstem | Thalami: MAE = 1.41 weeks<br>Brainstem: MAE = 2.56 weeks |
| Toews et al. 2012  | 8-590 days from birth | scale-invariant T1w features                                                       | MAE = 72 days                                            |
| Wu et al. 2019     | 14-48 days from birth | cortical measures                                                                  | MAE = $11.1 \pm 0.3$ days                                |

PMA = postmenstrual age, MAE = mean absolute error,  $r$  = Pearson’s coefficient between actual and predicted age.

578 Our data are consistent with previous studies of perinatal brain age predic-  
579 tion based on a single type of data or a single metric. For example, Brown et al.  
580 (2017) used dMRI tractography to predict brain dysmaturation in preterm in-  
581 fants with brain injury and abnormal developmental outcome and found that al-  
582 tered connectivity in the posterior cingulate gyrus and the inferior orbitofrontal  
583 cortex were associated with a delayed maturation; both of these regions are in-  
584 cluded in the networks identified by our model. Regional FA, MD, MK, and  $v_{ic}$   
585 are each predictive of age (Genc et al., 2017; Karmacharya et al., 2018; Ouyang  
586 et al., 2019), and the first three measures were selected in our age prediction  
587 model. Growth of the thalami and brainstem, defined in terms of myelin-like  
588 signals from T2-weighted images, successfully predicted age between 29 and 44  
589 weeks (Deprez et al., 2018) and these regions are included in the networks most  
590 predictive of age in the current study. In Toews et al. (2012), scale-invariant  
591 image features were extracted from T1-weighted MRI data of 92 subjects over  
592 an age range of 8-590 days to build a developmental model that was used to  
593 predict age of new subjects; and Ceschin et al. (2018) proposed a deep learning  
594 approach to detect subcortical brain dysmaturation from T2-weighted fast spin  
595 echo images in infants with congenital heart disease. Wu et al. (2019) used  
596 cortical features extracted from structural images to predict age of 50 healthy  
597 subjects with 251 longitudinal MRI scans from 14 to 797 days; in accordance  
598 with our results, the regions reported to be important for age prediction were  
599 bilateral medial orbitofrontal, parahippocampal, temporal pole, right superior  
600 parietal and posterior cingulate cortex. Although our results are not directly  
601 comparable with the above works because of the heterogeneity of employed  
602 models, validation techniques and population variation (different age ranges),  
603 our prediction error is among the lowest reported (see Table 2 for a summary of  
604 previous results), but it should be noted that there is a strong positive correla-  
605 tion between the reported MAEs and the age range of the samples. In addition,  
606 many works have identified imaging biomarkers associated with preterm birth,  
607 such as brain tissue volume (Alexander et al., 2018; Gui et al., 2019), myelin  
608 content (Melbourne et al., 2016), and diffusion tensor metrics (Anjari et al.,

609 2007; Bouyssi-Kobar et al., 2018).

610 The connections most predictive of age revealed that brain maturation is  
611 characterised by morphological convergence of some networks and divergence  
612 of others (Fig. 7). These connections mostly involve fronto-temporal and sub-  
613 cortical ROIs, which suggests that the micro- and macro-structural properties  
614 of these regions are highly dynamic between 38-45 weeks. Among these, inter-  
615 regional similarities within GM and WM increase with age, similarities between  
616 cortical GM and WM decrease, while subcortical ROIs become more similar  
617 to WM and more dissimilar to cortical GM. This is consistent with previous  
618 findings on the different trends in development of the thalamus and the cortex  
619 (Eaton-Rosen et al., 2015). Additionally, in a study of early development of  
620 structural networks (Batalle et al., 2017), connections to and from deep grey  
621 matter are reported to show the most rapid developmental changes between  
622 25-45 weeks, while intra-frontal, frontal to cingulate, frontal to caudate and  
623 inter-hemispheric connections are reported to mature more slowly.

624 Conversely, the inter-regional similarities selected by the SVM classifier to  
625 discriminate between term and preterm (Fig. 5) are more distributed across  
626 cortical GM and WM and are for the most part greater in the preterm group.  
627 The fact that in the term group these cortical ROIs are less homogeneous in  
628 terms of structural properties could be interpreted as a sign that in term infants  
629 these regions are at a different stage of maturation where their morphological  
630 profile is consolidating along specialised developmental trajectories. It has been  
631 previously suggested that the rapid maturation of cortical structures occurring  
632 in the perinatal period is vulnerable to the effects of preterm birth (Kostović  
633 and Jovanov-Milošević, 2006; Ball et al., 2011, 2013b; Smyser et al., 2016b).

634 The differences between networks identified for age prediction and for preterm  
635 classification indicate that atypical brain development after preterm birth is not  
636 solely a problem of delayed maturation, but it is characterised by a specific sig-  
637 nature. Indeed, while the age prediction networks capture changes occurring in  
638 both the preterm and the term group, the classification networks highlight where  
639 there are group-wise differences, and they do not match: in the case of a delayed

640 maturation we would have observed differences in the same regions undergoing  
641 age-related changes. MSN variations associated with preterm birth affected  
642 brain stem, thalami, sub-thalamic nuclei, WM regions in the frontal and insular  
643 lobes, GM regions in the occipital lobe, and WM and GM regions in the tempo-  
644 ral and parietal lobes and in the posterior cingulate cortex. This distribution of  
645 structural variation is consistent with previous reports of regional alteration in  
646 brain volume and dMRI parameters based on single contrasts (Boardman et al.,  
647 2006; Bonifacio et al., 2010; Ball et al., 2013a; Brown et al., 2017; Batalle et al.,  
648 2017; Alexander et al., 2018; Thompson et al., 2018b; Bouyssi-Kobar et al.,  
649 2018). Furthermore, compared to the age prediction model, the MSNs used  
650 for preterm classification are based on four additional metrics: T1/T2, related  
651 to myelination; RD, measuring water dispersion;  $v_{ic}$  describing neurite density;  
652 and  $ODI_{TOT}$ , associated with the fanning of WM tracts. All these metrics con-  
653 tribute to characterise the micro-structural alterations associated with preterm  
654 birth (Eaton-Rosen et al., 2015; Melbourne et al., 2016; Batalle et al., 2018;  
655 Thompson et al., 2018b; Bouyssi-Kobar et al., 2018).

656 We observed a disproportion in the distribution of the connections selected  
657 by our models, with a preference for the right hemisphere, hinting at the ex-  
658 istence of lateralization in the maturational process. An asymmetry in the  
659 development of the right hemisphere in neonates was previously reported in  
660 Dubois et al. (2010); Yap et al. (2011); Wu et al. (2019), and our experiments  
661 (section 3.3) partially supported the hypothesis that the right hemisphere plays  
662 a relevant role in the context of age prediction.

#### 663 *4.1. Limitations*

664 This work has some limitations. First, compared with the original work  
665 on MSNs (Seidlitz et al., 2018), we did not have a multi-parametric mapping  
666 sequence (Weiskopf et al., 2013); however, because the model is extensible, in-  
667 formation from other contrasts could be added and evaluated for their effect on  
668 prediction. The MSN model could also be applied to study the properties of cor-  
669 tical gray matter (such as thickness, sulcal depth or curvature), that have been

670 previously reported to be predictive of age in children (Brown et al., 2012) and  
671 could contribute significantly in characterising the newborn brain. However,  
672 metrics that only apply to selected structures (e.g. the cortex) cannot be used  
673 in a whole brain analysis, as to compute inter-regional similarities each region  
674 needs to be described by the same set of metrics. This particular study was  
675 designed based on prior knowledge that typical development and atypical devel-  
676 opment associated with preterm birth are characterised by global changes (Ball  
677 et al., 2013a; Anderson, 2014; Eaton-Rosen et al., 2015; Melbourne et al., 2014),  
678 and MSNs integrating dMRI and sMRI data were chosen to study generalised  
679 processes across the whole brain.

680 Second, we used a motion correction technique that attenuates the impact  
681 of head motion on structural connectivity (Andersson and Sotiropoulos, 2016;  
682 Baum et al., 2018), and we found that scanner motion was not contributing  
683 significantly to prediction accuracy; however we cannot rule out a possible con-  
684 founding effect of motion on the estimation of regional metrics.

685 Third, the preterm study population was representative of survivors of mod-  
686 ern neonatal intensive care in terms of gestational age range and prevalence of  
687 co-morbidities of preterm birth that may influence brain maturation, but it is  
688 still possible that the results were influenced by biological variability specific  
689 to the cohort. A replication study will be required to determine whether the  
690 patterns of dysmaturation we found are generalisable.

691 Finally, we assessed the performance of our models with both LOOCV and  
692 10-5-fold schemes in order to investigate the stability of our findings with respect  
693 to the chosen cross-validation scheme and we observed some variability in the  
694 general trends of the results. The disagreement we found might derive from  
695 the limited size of the training set in the case of the repeated-5-fold scheme (all  
696 models tended to perform worse, suggesting there were not enough samples for  
697 learning), and this was indeed the reason why our first choice was the leave-  
698 one-out scheme. As it is always the case when working with machine learning,  
699 increasing the sample size would increase the power of the models, thereby  
700 reducing the margin of error and the risk of overfitting, with the result that

701 both schemes should converge to similar findings.

#### 702 *4.2. Conclusions*

703 Combining multiple imaging features in a single model enabled a detailed de-  
704 scription of the morphological properties of the developing brain that was used  
705 inside a predictive framework to identify two networks of regions: the first, pre-  
706 dominantly located in subcortical and fronto-temporal areas, that contributed  
707 most to age prediction: the second, comprising mostly frontal, parietal, tem-  
708 poral and insular regions, that discriminated between preterm and term born  
709 infant brains. Both predictive models performed best when structural, diffu-  
710 sion tensor-derived and NODDI metrics were combined, which demonstrates  
711 the importance of integrating different biomarkers to generate a global picture  
712 of the developing human brain. The achieved accuracy supports the hypothesis  
713 that studying the interaction between regional metrics can shed light on the  
714 mechanics of development.

715 Morphology, structural connectivity and maturation are all influenced by  
716 genetics, co-morbidities of preterm birth, and nutrition (Boardman et al., 2014;  
717 Anblagan et al., 2016; Sparrow et al., 2016; Krishnan et al., 2016; Ball et al.,  
718 2017; Alexander et al., 2018; Blesa et al., 2019). In future work MSNs could  
719 offer new understanding of the impact of these factors on integrated measures of  
720 brain development, and the relationship between neonatal MSNs and functional  
721 outcome could bring novel insights into the neural bases of cognition and be-  
722 haviour, by identifying networks of regions associated with later development.  
723 MSNs could also enable a direct comparison with functional networks extracted  
724 from fMRI, to explore how structure and function interplay in the neonatal pe-  
725 riod, and study how well the two network models together explain individual  
726 variability in developmental outcome.

#### 727 **Conflicts of interest**

728 Authors declare no conflict of interests.



729 **Acknowledgements**

730 We are grateful to the families who consented to take part in the study. This  
731 work was supported by Theirworld ([www.theirworld.org](http://www.theirworld.org)) and was undertaken  
732 in the MRC Centre for Reproductive Health, which is funded by MRC Centre  
733 Grant (MRC G1002033). MJT was supported by NHS Lothian Research and  
734 Development Office. Participants were scanned in the University of Edinburgh  
735 Imaging Research MRI Facility at the Royal Infirmary of Edinburgh which was  
736 established with funding from The Wellcome Trust, Dunhill Medical Trust, Ed-  
737 inburgh and Lothians Research Foundation, Theirworld, The Muir Maxwell  
738 Trust and many other sources; we thank the University's imaging research staff  
739 for providing the infant scanning.

740 **References**

- 741 Alexander, B., Kelly, C.E., Adamson, C., Beare, R., Zannino, D., Chen, J.,  
742 Murray, A.L., Loh, W.Y., Matthews, L.G., Warfield, S.K., Anderson, P.J.,  
743 Doyle, L.W., Seal, M.L., Spittle, A.J., Cheong, J.L., Thompson, D.K., 2018.  
744 Changes in neonatal regional brain volume associated with preterm birth and  
745 perinatal factors. *NeuroImage* doi:10.1016/j.neuroimage.2018.07.021.
- 746 Alexander-Bloch, A., Giedd, J.N., Bullmore, E., 2013. Imaging structural co-  
747 variance between human brain regions. *Nature Reviews Neuroscience* 14,  
748 322–336. doi:10.1038/nrn3465.
- 749 Anblagan, D., Pataky, R., Evans, M.J., Telford, E.J., Serag, A., Sparrow, S.,  
750 Piyasena, C., Semple, S.I., Wilkinson, A.G., Bastin, M.E., Boardman, J.P.,  
751 2016. Association between preterm brain injury and exposure to chorioam-  
752 nionitis during fetal life. *Scientific Reports* 6, 37932. doi:10.1038/srep37932.
- 753 Anderson, P.J., 2014. Neuropsychological outcomes of children born very  
754 preterm. *Seminars in Fetal and Neonatal Medicine* 19, 90–96. doi:10.1016/  
755 J.SINY.2013.11.012.

- 756 Andersson, J.L., Graham, M.S., Drobnyak, I., Zhang, H., Filippini, N., Bastiani,  
757 M., 2017. Towards a comprehensive framework for movement and distortion  
758 correction of diffusion MR images: Within volume movement. *NeuroImage*  
759 152, 450–466. doi:10.1016/j.neuroimage.2017.02.085.
- 760 Andersson, J.L., Graham, M.S., Zsoldos, E., Sotiropoulos, S.N., 2016. Inco-  
761 rporating outlier detection and replacement into a non-parametric framework  
762 for movement and distortion correction of diffusion MR images. *NeuroImage*  
763 141, 556–572. doi:10.1016/j.neuroimage.2016.06.058.
- 764 Andersson, J.L., Skare, S., Ashburner, J., 2003. How to correct susceptibil-  
765 ity distortions in spin-echo echo-planar images: application to diffusion ten-  
766 sor imaging. *NeuroImage* 20, 870 – 888. doi:[https://doi.org/10.1016/  
767 S1053-8119\(03\)00336-7](https://doi.org/10.1016/S1053-8119(03)00336-7).
- 768 Andersson, J.L., Sotiropoulos, S.N., 2016. An integrated approach to correc-  
769 tion for off-resonance effects and subject movement in diffusion MR imaging.  
770 *NeuroImage* 125, 1063–1078. doi:10.1016/j.neuroimage.2015.10.019.
- 771 Anjari, M., Srinivasan, L., Allsop, J.M., Hajnal, J.V., Rutherford, M.A., Ed-  
772 wards, A.D., Counsell, S.J., 2007. Diffusion tensor imaging with tract-based  
773 spatial statistics reveals local white matter abnormalities in preterm infants.  
774 *NeuroImage* 35, 1021–1027. doi:10.1016/J.NEUROIMAGE.2007.01.035.
- 775 Avants, B.B., Tustison, N.J., Song, G., Cook, P.A., Klein, A., Gee, J.C., 2011. A  
776 reproducible evaluation of ants similarity metric performance in brain image  
777 registration. *NeuroImage* 54, 2033 – 2044. doi:[https://doi.org/10.1016/  
778 j.neuroimage.2010.09.025](https://doi.org/10.1016/j.neuroimage.2010.09.025).
- 779 Back, S.A., Miller, S.P., 2014. Brain injury in premature neonates: A primary  
780 cerebral dysmaturation disorder? *Annals of Neurology* 75, 469–486.
- 781 Ball, G., Aljabar, P., Arichi, T., Tusor, N., Cox, D., Merchant, N., Nongena, P.,  
782 Hajnal, J., Edwards, A., Counsell, S., 2016. Machine-learning to characterise

- 783 neonatal functional connectivity in the preterm brain. *NeuroImage* 124, 267–  
784 275. doi:10.1016/J.NEUROIMAGE.2015.08.055.
- 785 Ball, G., Aljabar, P., Nongena, P., Kennea, N., Gonzalez-Cinca, N., et al., 2017.  
786 Multimodal image analysis of clinical influences on preterm brain develop-  
787 ment. *Annals of Neurology* 82, 233–246. doi:10.1002/ana.24995.
- 788 Ball, G., Boardman, J.P., Aljabar, P., Pandit, A., Arichi, T., Merchant, N.,  
789 Rueckert, D., Edwards, A.D., Counsell, S.J., 2013a. The influence of preterm  
790 birth on the developing thalamocortical connectome. *Cortex* 49, 1711 – 1721.  
791 doi:<https://doi.org/10.1016/j.cortex.2012.07.006>.
- 792 Ball, G., Boardman, J.P., Rueckert, D., Aljabar, P., Arichi, T., Merchant, N.,  
793 Gousias, I.S., Edwards, A.D., Counsell, S.J., 2011. The effect of preterm birth  
794 on thalamic and cortical development. *Cerebral Cortex* 22, 1016–1024.
- 795 Ball, G., Srinivasan, L., Aljabar, P., Counsell, S.J., Durighel, G., Hajnal, J.V.,  
796 Rutherford, M.A., Edwards, A.D., 2013b. Development of cortical microstruc-  
797 ture in the preterm human brain. *Proceedings of the National Academy of*  
798 *Sciences* 110, 9541–9546. doi:10.1073/PNAS.1301652110.
- 799 Barnett, M.L., Tusor, N., Ball, G., Chew, A., Falconer, S., Aljabar, P., Kimpton,  
800 J.A., Kennea, N., Rutherford, M., David Edwards, A., Counsell, S.J., 2018.  
801 Exploring the multiple-hit hypothesis of preterm white matter damage using  
802 diffusion MRI. *NeuroImage: Clinical* 17, 596–606. doi:10.1016/J.NICL.  
803 2017.11.017.
- 804 Bastiani, M., Andersson, J., Cordero-Grande, L., Murgasova, M., Hutter, J.,  
805 Price, A.N., Makropoulos, A., Fitzgibbon, S.P., Hughes, E., Rueckert, D.,  
806 Victor, S., Rutherford, M., Edwards, A.D., Smith, S., Tournier, J.D., Hajnal,  
807 J.V., Jbabdi, S., Sotiropoulos, S.N., 2018. Automated processing pipeline for  
808 neonatal diffusion MRI in the developing human connectome project. *Neu-*  
809 *roImage* doi:<https://doi.org/10.1016/j.neuroimage.2018.05.064>.

- 810 Bastiani, M., Cottaar, M., Fitzgibbon, S.P., Suri, S., Alfaro-Almagro, F.,  
811 Sotiropoulos, S.N., Jbabdi, S., Andersson, J.L., 2019. Automated quality control  
812 for within and between studies diffusion MRI data using a non-parametric  
813 framework for movement and distortion correction. *NeuroImage* 184, 801 –  
814 812. doi:<https://doi.org/10.1016/j.neuroimage.2018.09.073>.
- 815 Batalle, D., Edwards, A.D., O’Muircheartaigh, J., 2018b. Annual research review:  
816 Not just a small adult brain: understanding later neurodevelopment  
817 through imaging the neonatal brain. *Journal of Child Psychology and Psychiatry* 59,  
818 350–371. doi:10.1111/jcpp.12838.
- 819 Batalle, D., Hughes, E.J., Zhang, H., Tournier, J.D., Tumor, N., others., 2017.  
820 Early development of structural networks and the impact of prematurity on  
821 brain connectivity. *NeuroImage* 149, 379–392. doi:10.1016/j.neuroimage.  
822 2017.01.065.
- 823 Batalle, D., O’Muircheartaigh, J., Makropoulos, A., Kelly, C.J., Dimitrova,  
824 R., Hughes, E.J., Hajnal, J.V., Zhang, H., Alexander, D.C., Edwards, A.D.,  
825 Counsell, S.J., 2018. Different patterns of cortical maturation before and after  
826 38 weeks gestational age demonstrated by diffusion MRI in vivo. *NeuroImage*  
827 doi:<https://doi.org/10.1016/j.neuroimage.2018.05.046>.
- 828 Baum, G.L., Roalf, D.R., Cook, P.A., Ciric, R., Rosen, A.F., Xia, C., Elliott,  
829 M.A., Ruparel, K., Verma, R., Tunç, B., et al., 2018. The impact of in-  
830 scanner head motion on structural connectivity derived from diffusion mri.  
831 *Neuroimage* 173, 275–286.
- 832 Blesa, M., Sullivan, G., Anblagan, D., Telford, E.J., Quigley, A.J., Sparrow,  
833 S.A., Serag, A., Semple, S.I., Bastin, M.E., Boardman, J.P., 2019. Early  
834 breast milk exposure modifies brain connectivity in preterm infants. *NeuroImage*  
835 184, 431 – 439. doi:[https://doi.org/10.1016/j.neuroimage.2018.09.](https://doi.org/10.1016/j.neuroimage.2018.09.045)  
836 045.
- 837 Boardman, J., Craven, C., Valappil, S., Counsell, S., Dyet, L., Rueckert, D.,  
838 Aljabar, P., Rutherford, M., Chew, A., Allsop, J., Cowan, F., Edwards, A.,

839 2010. A common neonatal image phenotype predicts adverse neurodevel-  
840 opmental outcome in children born preterm. *NeuroImage* 52, 409 – 414.  
841 doi:<https://doi.org/10.1016/j.neuroimage.2010.04.261>.

842 Boardman, J.P., Counsell, S.J., Rueckert, D., Kapellou, O., Bhatia, K.K.,  
843 Aljabar, P., Hajnal, J., Allsop, J.M., Rutherford, M.A., Edwards, A.D.,  
844 2006. Abnormal deep grey matter development following preterm birth  
845 detected using deformation-based morphometry. *NeuroImage* 32, 70–78.  
846 doi:<https://doi.org/10.1016/j.neuroimage.2006.03.029>.

847 Boardman, J.P., Walley, A., Ball, G., Takousis, P., Krishnan, M.L., Hughes-  
848 Carre, L., Aljabar, P., Serag, A., King, C., Merchant, N., Srinivasan, L.,  
849 Froguel, P., Hajnal, J., Rueckert, D., Counsell, S., Edwards, A.D., 2014.  
850 Common genetic variants and risk of brain injury after preterm birth. *Pedi-  
851 atrics* 133, e1655–e1663. doi:10.1542/peds.2013-3011.

852 Bonifacio, S.L., Glass, H.C., Chau, V., Berman, J.I., Xu, D., Brant, R.,  
853 Barkovich, A.J., Poskitt, K.J., Miller, S.P., Ferriero, D.M., 2010. Extreme  
854 premature birth is not associated with impaired development of brain mi-  
855 crostructure. *The Journal of Pediatrics* 157, 726–732.e1. doi:10.1016/J.  
856 JPEDS.2010.05.026.

857 Bouyssi-Kobar, M., Brossard-Racine, M., Jacobs, M., Murnick, J., Chang, T.,  
858 Limperopoulos, C., 2018. Regional microstructural organization of the cere-  
859 bral cortex is affected by preterm birth. *NeuroImage: Clinical* 18, 871–880.  
860 doi:10.1016/j.nicl.2018.03.020.

861 Brown, C.J., Miller, S.P., Booth, B.G., Andrews, S., Chau, V., Poskitt, K.J.,  
862 Hamarneh, G., 2014. Structural network analysis of brain development in  
863 young preterm neonates. *NeuroImage* 101, 667 – 680. doi:[https://doi.org/  
864 10.1016/j.neuroimage.2014.07.030](https://doi.org/10.1016/j.neuroimage.2014.07.030).

865 Brown, C.J., Moriarty, K.P., Miller, S.P., Booth, B.G., et al., 2017. Predic-  
866 tion of brain network age and factors of delayed maturation in very preterm

- 867 infants, in: *Lecture Notes in Computer Science*, pp. 84–91. doi:10.1007/  
868 978-3-319-66182-7\_10.
- 869 Brown, T., Kuperman, J., Chung, Y., Erhart, M., McCabe, C., Hagler, D.,  
870 Venkatraman, V., Akshoomoff, N., Amaral, D., Bloss, C., Casey, B., Chang,  
871 L., Ernst, T., Frazier, J., Gruen, J., Kaufmann, W., Kenet, T., Kennedy,  
872 D., Murray, S., Sowell, E., Jernigan, T., Dale, A., 2012. Neuroanatomical  
873 Assessment of Biological Maturity. *Current Biology* 22, 1693–1698. doi:10.  
874 1016/J.CUB.2012.07.002.
- 875 Caldinelli, C., Froudust-Walsh, S., Karolis, V., Tseng, C.E., Allin, M.P., Walshe,  
876 M., Cuddy, M., Murray, R.M., Nosarti, C., 2017. White matter alterations to  
877 cingulum and fornix following very preterm birth and their relationship with  
878 cognitive functions. *NeuroImage* 150, 373 – 382. doi:[https://doi.org/10.](https://doi.org/10.1016/j.neuroimage.2017.02.026)  
879 [1016/j.neuroimage.2017.02.026](https://doi.org/10.1016/j.neuroimage.2017.02.026).
- 880 Cao, M., Huang, H., He, Y., 2017. Developmental connectomics from infancy  
881 through early childhood. *Trends in neurosciences* 40, 494 – 506.
- 882 Caruyer, E., Lenglet, C., Sapiro, G., Deriche, R., 2013. Design of multishell sam-  
883 pling schemes with uniform coverage in diffusion MRI. *Magnetic Resonance*  
884 *in Medicine* 69, 1534–1540. doi:10.1002/mrm.24736.
- 885 Ceschin, R., Zahner, A., Reynolds, W., Gaesser, J., Zuccoli, G., Lo, C.W.,  
886 Gopalakrishnan, V., Panigrahy, A., 2018. A computational framework for  
887 the detection of subcortical brain dysmaturity in neonatal MRI using 3D  
888 Convolutional Neural Networks. *NeuroImage* 178, 183–197. doi:10.1016/J.  
889 [NEUROIMAGE.2018.05.049](https://doi.org/10.1016/J.NEUROIMAGE.2018.05.049).
- 890 Counsell, S.J., Edwards, A.D., Chew, A.T.M., Cowan, F.M., Boardman, J.P.,  
891 Allsop, J.M., Hajnal, J.V., Srinivasan, L., Dyet, L.E., Rutherford, M.A.,  
892 Anjari, M., 2008. Specific relations between neurodevelopmental abilities and  
893 white matter microstructure in children born preterm. *Brain* 131, 3201–3208.

- 894 Deprez, M., Wang, S., Ledig, C., Hajnal, J., Counsell, S., Schnabel, J., 2018.  
895 Segmentation of myelin-like signals on clinical MR images for age estimation  
896 in preterm infants. bioRxiv doi:10.1101/357749.
- 897 Dubois, J., Benders, M., Lazeyras, F., Borradori-Tolsa, C., Leuchter, R.H.V.,  
898 Mangin, J., Hüppi, P., 2010. Structural asymmetries of perisylvian regions in  
899 the preterm newborn. *NeuroImage* 52, 32–42. doi:10.1016/J.NEUROIMAGE.  
900 2010.03.054.
- 901 Duerden, E.G., Grunau, R.E., Guo, T., Foong, J., Pearson, A., Au-  
902 Young, S., Lavoie, R., Chakravarty, M.M., Chau, V., Synnes, A.,  
903 Miller, S.P., 2018. Early procedural pain is associated with regionally-  
904 specific alterations in thalamic development in preterm neonates.  
905 *Journal of Neuroscience* 38, 878–886. URL: <https://www.jneurosci.org/content/38/4/878>,  
906 doi:10.1523/JNEUROSCI.0867-17.2017,  
907 arXiv:<https://www.jneurosci.org/content/38/4/878.full.pdf>.
- 908 Duerden, E.G., Guo, T., Dodbiba, L., Chakravarty, M.M., Chau, V., Poskitt,  
909 K.J., Synnes, A., Grunau, R.E., Miller, S.P., 2016. Midazolam dose corre-  
910 lates with abnormal hippocampal growth and neurodevelopmental outcome in  
911 preterm infants. *Annals of Neurology* 79, 548–559. doi:10.1002/ana.24601.
- 912 Eaton-Rosen, Z., Melbourne, A., Orasanu, E., Cardoso, M.J., Modat, M., Bain-  
913 bridge, A., Kendall, G.S., Robertson, N.J., Marlow, N., Ourselin, S., 2015.  
914 Longitudinal measurement of the developing grey matter in preterm sub-  
915 jects using multi-modal MRI. *NeuroImage* 111, 580–589. doi:10.1016/J.  
916 NEUROIMAGE.2015.02.010.
- 917 Efron, B., 1983. Estimating the error rate of a prediction rule: improvement on  
918 cross-validation. *Journal of the American statistical association* 78, 316–331.
- 919 Genc, S., Malpas, C.B., Holland, S.K., Beare, R., Silk, T.J., 2017. Neurite  
920 density index is sensitive to age related differences in the developing brain.  
921 *NeuroImage* 148, 373–380. doi:10.1016/j.neuroimage.2017.01.023.

- 922 Glasser, M.F., Van Essen, D.C., 2011. Mapping human cortical areas in vivo  
923 based on myelin content as revealed by T1- and T2-Weighted MRI. *Journal*  
924 *of Neuroscience* 31, 11597–11616. doi:10.1523/JNEUROSCI.2180-11.2011.
- 925 Gousias, I.S., Edwards, A.D., Rutherford, M.A., Counsell, S.J., Hajnal, J.V.,  
926 Rueckert, D., Hammers, A., 2012. Magnetic resonance imaging of the newborn  
927 brain: Manual segmentation of labelled atlases in term-born and preterm  
928 infants. *NeuroImage* 62, 1499 – 1509. doi:[https://doi.org/10.1016/j.](https://doi.org/10.1016/j.neuroimage.2012.05.083)  
929 [neuroimage.2012.05.083](https://doi.org/10.1016/j.neuroimage.2012.05.083).
- 930 Greve, D.N., Fischl, B., 2009. Accurate and robust brain image alignment  
931 using boundary-based registration. *NeuroImage* 48, 63–72. doi:10.1016/j.  
932 [neuroimage.2009.06.060](https://doi.org/10.1016/j.neuroimage.2009.06.060).
- 933 Grussu, F., Schneider, T., Tur, C., Yates, R.L., Tachrount, M., Ianuș, A., Yian-  
934 nakas, M.C., Newcombe, J., Zhang, H., Alexander, D.C., et al., 2017. Neurite  
935 dispersion: a new marker of multiple sclerosis spinal cord pathology? *Annals*  
936 *of clinical and translational neurology* 4, 663–679.
- 937 Gui, L., Loukas, S., Lazeyras, F., Hüppi, P., Meskaldji, D., Borradori Tolsa, C.,  
938 2019. Longitudinal study of neonatal brain tissue volumes in preterm infants  
939 and their ability to predict neurodevelopmental outcome. *NeuroImage* 185,  
940 728–741. doi:10.1016/J.NEUROIMAGE.2018.06.034.
- 941 Hernandez-Fernandez, M., Reguly, I., Jbabdi, S., Giles, M., Smith, S.,  
942 Sotiropoulos, S.N., 2019. Using gpus to accelerate computational diffu-  
943 sion MRI: From microstructure estimation to tractography and connectomes.  
944 *NeuroImage* 188, 598 – 615. doi:[https://doi.org/10.1016/j.neuroimage.](https://doi.org/10.1016/j.neuroimage.2018.12.015)  
945 [2018.12.015](https://doi.org/10.1016/j.neuroimage.2018.12.015).
- 946 Hunter, J.D., 2007. Matplotlib: A 2d graphics environment. *Computing in*  
947 *science & engineering* 9, 90.
- 948 Jelescu, I.O., Veraart, J., Adisetiyo, V., Milla, S.S., Novikov, D.S.,  
949 Fieremans, E., 2015. One diffusion acquisition and different white



- 950 matter models: How does microstructure change in human early de-  
951 velopment based on wmti and noddi? *NeuroImage* 107, 242  
952 – 256. URL: [http://www.sciencedirect.com/science/article/pii/](http://www.sciencedirect.com/science/article/pii/S1053811914010015)  
953 [S1053811914010015](http://www.sciencedirect.com/science/article/pii/S1053811914010015), doi:[https://doi.org/10.1016/j.neuroimage.2014.](https://doi.org/10.1016/j.neuroimage.2014.12.009)  
954 [12.009](https://doi.org/10.1016/j.neuroimage.2014.12.009).
- 955 Jensen, J., Helpert, J., Ramani, A., Lu, H., Kaczynski, K., 2005. Diffusional  
956 kurtosis imaging: The quantification of nongaussian water diffusion by means  
957 of magnetic resonance imaging. *Magnetic Resonance in Medicine* 53, 1432–  
958 1440. doi:10.1002/mrm.20508.
- 959 Job, D.E., Dickie, D.A., Rodriguez, D., Robson, A., Danso, S., Per-  
960 net, C., Bastin, M.E., Boardman, J.P., Murray, A.D., Ahearn, T.,  
961 Waiter, G.D., Staff, R.T., Deary, I.J., Shenkin, S.D., Wardlaw, J.M.,  
962 2017. A brain imaging repository of normal structural mri across the  
963 life course: Brain images of normal subjects (brains). *NeuroImage* 144,  
964 299 – 304. URL: [http://www.sciencedirect.com/science/article/pii/](http://www.sciencedirect.com/science/article/pii/S1053811916000331)  
965 [S1053811916000331](http://www.sciencedirect.com/science/article/pii/S1053811916000331), doi:[https://doi.org/10.1016/j.neuroimage.2016.](https://doi.org/10.1016/j.neuroimage.2016.01.027)  
966 [01.027](https://doi.org/10.1016/j.neuroimage.2016.01.027). data Sharing Part II.
- 967 Jones, E., Oliphant, T., Peterson, P., et al., 2001. SciPy: Open source scientific  
968 tools for Python,. <http://www.scipy.org/>.
- 969 Karmacharya, S., Gagoski, B., Ning, L., Vyas, R., Cheng, H.H., Soul, J., New-  
970 berger, J.W., Shenton, M.E., Rathi, Y., Grant, P.E., 2018. Advanced diffu-  
971 sion imaging for assessing normal white matter development in neonates and  
972 characterizing aberrant development in congenital heart disease. *NeuroImage:*  
973 *Clinical* 19, 360–373. doi:10.1016/j.nicl.2018.04.032.
- 974 Kellner, E., Dhital, B., Kiselev, V.G., Reiser, M., 2016. Gibbs-ringing artifact  
975 removal based on local subvoxel-shifts. *Magnetic Resonance in Medicine* 76,  
976 1574–1581. doi:10.1002/mrm.26054.
- 977 Keunen, K., Benders, M.J., Leemans, A., Fieret-Van Stam, P.C., Scholtens,  
978 L.H., Viergever, M.A., Kahn, R.S., Groenendaal, F., de Vries, L.S., van den

- 979 Heuvel, M.P., 2017. White matter maturation in the neonatal brain is pre-  
980 dictive of school age cognitive capacities in children born very preterm. *De-*  
981 *velopmental Medicine & Child Neurology* 59, 939–946.
- 982 Kohavi, R., 1995. A study of cross-validation and bootstrap for accuracy esti-  
983 mation and model selection, in: *Proceedings of the 14th international joint*  
984 *conference on Artificial intelligence-Volume 2*, Morgan Kaufmann Publishers  
985 Inc.. pp. 1137–1143.
- 986 Kostović, I., Jovanov-Milošević, N., 2006. The development of cerebral connec-  
987 tions during the first 2045 weeks' gestation. *Seminars in Fetal and Neonatal*  
988 *Medicine* 11, 415–422. doi:10.1016/J.SINY.2006.07.001.
- 989 Krishnan, M.L., Van Steenwinckel, J., Schang, A.L., Yan, J., Arnadottir, J.,  
990 Le Charpentier, T., Csaba, Z., Dournaud, P., Cipriani, Constance Auvynet,  
991 S., Titomanlio, L., Pansiot, J., Ball, G., Boardman, J.P., Walley, A.J., Saxena,  
992 A., Mirza, G., Fleiss, B., Edwards, A.D., Petretto, E., Gressens, P., 2017.  
993 Integrative genomics of microglia implicates *dlg4* (*psd95*) in the white matter  
994 development of preterm infants. *Nature Communications* 8.
- 995 Krishnan, M.L., Wang, Z., Silver, M., Boardman, J.P., Ball, G., Coun-  
996 sell, S.J., Walley, A.J., Montana, G., Edwards, A.D., 2016. Possible re-  
997 lationship between common genetic variation and white matter develop-  
998 ment in a pilot study of preterm infants. *Brain and behavior* 6, e00434.  
999 doi:10.1002/brb3.434.
- 1000 Krzywinski, M., Schein, J., Birol, I., Connors, J., Gascoyne, R., Horsman, D.,  
1001 Jones, S.J., Marra, M.A., 2009. Circos: an information aesthetic for compar-  
1002 ative genomics. *Genome research* 19, 1639–45. doi:10.1101/gr.092759.109.
- 1003 Kulikova, S., Hertz-Pannier, L., Dehaene-Lambertz, G., Buzmakov, A., Poupon,  
1004 C., Dubois, J., 2015. Multi-parametric evaluation of the white matter  
1005 maturation. *Brain Structure and Function* 220, 3657–3672. doi:10.1007/  
1006 s00429-014-0881-y.

- 1007 Kunz, N., Zhang, H., Vasung, L., O'Brien, K.R., Assaf, Y., Lazeyras, F., Alexan-  
1008 der, D.C., Hüppi, P.S., 2014. Assessing white matter microstructure of the  
1009 newborn with multi-shell diffusion MRI and biophysical compartment models.  
1010 *NeuroImage* 96, 288–299. doi:10.1016/j.neuroimage.2014.03.057.
- 1011 Leuchter, R.H.V., Gui, L., Poncet, A., Hagmann, C., Lodygensky, G.A., Martin,  
1012 E., Koller, B., Darqu, A., Bucher, H.U., Hppi, P.S., 2014. Association Between  
1013 Early Administration of High-Dose Erythropoietin in Preterm Infants and  
1014 Brain MRI Abnormality at Term-Equivalent Age. *JAMA* 312, 817–824.
- 1015 Li, W., Yang, C., Shi, F., Wu, S., Wang, Q., Nie, Y., Zhang, X., 2017. Construc-  
1016 tion of individual morphological brain networks with multiple morphometric  
1017 features. *Frontiers in Neuroanatomy* 11. doi:10.3389/fnana.2017.00034.
- 1018 Li, X., Morgan, P.S., Ashburner, J., Smith, J., Rorden, C., 2016. The first step  
1019 for neuroimaging data analysis: Dicom to nifti conversion. *Journal of Neuro-*  
1020 *science Methods* 264, 47 – 56. doi:[https://doi.org/10.1016/j.jneumeth.](https://doi.org/10.1016/j.jneumeth.2016.03.001)  
1021 [2016.03.001](https://doi.org/10.1016/j.jneumeth.2016.03.001).
- 1022 Mahjoub, I., Mahjoub, M.A., Reik, I., 2018. Brain multiplexes reveal mor-  
1023 phological connectional biomarkers fingerprinting late brain dementia states.  
1024 *Scientific Reports* 8, 4103. doi:10.1038/s41598-018-21568-7.
- 1025 Makropoulos, A., Aljabar, P., Wright, R., Hüning, B., Merchant, N., et al., 2016.  
1026 Regional growth and atlasing of the developing human brain. *NeuroImage*  
1027 125, 456–478. doi:10.1016/j.neuroimage.2015.10.047.
- 1028 Makropoulos, A., Gousias, I.S., Ledig, C., Aljabar, P., Serag, A., Hajnal, J.V.,  
1029 Edwards, A.D., Counsell, S.J., Rueckert, D., 2014. Automatic whole brain  
1030 MRI segmentation of the developing neonatal brain. *IEEE Transactions on*  
1031 *Medical Imaging* 33, 1818–1831. doi:10.1109/TMI.2014.2322280.
- 1032 Makropoulos, A., Robinson, E.C., Schuh, A., Wright, R., Fitzgibbon, S., et al.,  
1033 2018. The developing human connectome project: A minimal processing

- 1034 pipeline for neonatal cortical surface reconstruction. *NeuroImage* 173, 88–  
1035 112. doi:10.1016/j.neuroimage.2018.01.054.
- 1036 Marcus, D., Harwell, J., Olsen, T., Hodge, M., Glasser, M., Prior, F., Jenkinson,  
1037 M., Laumann, T., Curtiss, S., Van Essen, D., 2011. Informatics and data  
1038 mining tools and strategies for the human connectome project. *Frontiers in*  
1039 *Neuroinformatics* 5, 4.
- 1040 Mathewson, K., Chow, C., Dobson, K., Pope, E., Schmidt, L., Van Lieshout,  
1041 R., 2017. Mental health of extremely low birth weight survivors: A systematic  
1042 review and meta-analysis. *Psychological Bulletin* 143, 347 – 383.
- 1043 Maximov, I.I., Alnaes, D., Westlye, L.T., 2019. Towards an optimised processing  
1044 pipeline for diffusion MRI data: Effects of artefact corrections on diffusion  
1045 metrics and their age associations in UK Biobank. *bioRxiv* .
- 1046 McKinney, W., et al., 2010. Data structures for statistical computing in python,  
1047 in: *Proceedings of the 9th Python in Science Conference*, Austin, TX. pp. 51–  
1048 56.
- 1049 Melbourne, A., Eaton-Rosen, Z., Orasanu, E., Price, D., Bainbridge, A., Car-  
1050 doso, M.J., Kendall, G.S., Robertson, N.J., Marlow, N., Ourselin, S., 2016.  
1051 Longitudinal development in the preterm thalamus and posterior white mat-  
1052 ter: MRI correlations between diffusion weighted imaging and T2 relaxome-  
1053 try. *Human Brain Mapping* 37, 2479–2492.
- 1054 Melbourne, A., Kendall, G.S., Cardoso, M.J., Gunny, R., Robertson, N.J., Mar-  
1055 low, N., Ourselin, S., 2014. Preterm birth affects the developmental synergy  
1056 between cortical folding and cortical connectivity observed on multimodal  
1057 MRI. *NeuroImage* 89, 23–34. doi:10.1016/J.NEUROIMAGE.2013.11.048.
- 1058 Nosarti, C., Reichenberg, A., Murray, R.M., Cnattingius, S., Lambe, M.P.,  
1059 Yin, L., MacCabe, J., Rifkin, L., Hultman, C.M., 2012. Preterm Birth and  
1060 Psychiatric Disorders in Young Adult Life. *Archives of General Psychiatry*  
1061 69, 610–617.

- 1062 Otsuka, Y., Chang, L., Kawasaki, Y., Wu, D., Ceritoglu, C., Oishi, K., Ernst,  
1063 T., Miller, M., Mori, S., Oishi, K., 2019. A multi-atlas label fusion tool for  
1064 neonatal brain mri parcellation and quantification. *Journal of Neuroimaging*  
1065 .
- 1066 Ouyang, M., Dubois, J., Yu, Q., Mukherjee, P., Huang, H., 2018. Delineation  
1067 of early brain development from fetuses to infants with diffusion MRI and  
1068 beyond. *NeuroImage* doi:10.1016/j.neuroimage.2018.04.017.
- 1069 Ouyang, M., Jeon, T., Sotiras, A., Peng, Q., Mishra, V., Halovanic, C., Chen,  
1070 M., Chalak, L., Rollins, N., Roberts, T.P.L., Davatzikos, C., Huang, H.,  
1071 2019. Differential cortical microstructural maturation in the preterm human  
1072 brain with diffusion kurtosis and tensor imaging. *Proceedings of the National*  
1073 *Academy of Sciences* , 201812156doi:10.1073/PNAS.1812156116.
- 1074 Pedregosa, F., Varoquaux, G., Gramfort, A., Michel, V., Thirion, B., Grisel, O.,  
1075 Blondel, M., Prettenhofer, P., Weiss, R., Dubourg, V., et al., 2011. Scikit-  
1076 learn: Machine learning in python. *Journal of machine learning research* 12,  
1077 2825–2830.
- 1078 Schneider, J., Fischer Fumeaux, C.J., Duerden, E.G., Guo, T., Foong, J.,  
1079 Graz, M.B., Hagmann, P., Chakravarty, M.M., Hüppi, P.S., Beauport, L.,  
1080 Truttman, A.C., Miller, S.P., 2018. Nutrient intake in the first two weeks  
1081 of life and brain growth in preterm neonates. *Pediatrics* 141. doi:10.1542/  
1082 *peds*.2017–2169.
- 1083 Seabold, S., Perktold, J., 2010. Statsmodels: Econometric and statistical mod-  
1084 eling with python, in: *Proceedings of the 9th Python in Science Conference*,  
1085 *Scipy*. p. 61.
- 1086 Seidlitz, J., Váša, F., Shinn, M., Romero-Garcia, R., Whitaker, K.J., et al.,  
1087 2018. Morphometric similarity networks detect microscale cortical organiza-  
1088 tion and predict inter-individual cognitive variation. *Neuron* 97, 231–247.e7.  
1089 doi:10.1016/j.neuron.2017.11.039.

- 1090 Serag, A., Aljabar, P., Ball, G., Counsell, S.J., Boardman, J.P., Rutherford,  
1091 M.A., Edwards, A.D., Hajnal, J.V., Rueckert, D., 2012. Construction of a  
1092 consistent high-definition spatio-temporal atlas of the developing brain using  
1093 adaptive kernel regression. *NeuroImage* 59, 2255 – 2265. doi:<https://doi.org/10.1016/j.neuroimage.2011.09.062>.
- 1095 Shi, F., Yap, P.T., Gao, W., Lin, W., Gilmore, J.H., Shen, D., 2012. Altered  
1096 structural connectivity in neonates at genetic risk for schizophrenia: A com-  
1097 bined study using morphological and white matter networks. *NeuroImage* 62,  
1098 1622–1633. doi:10.1016/j.neuroimage.2012.05.026.
- 1099 Smith, S.M., 2002. Fast robust automated brain extraction. *Human Brain*  
1100 *Mapping* 17, 143–155. doi:10.1002/hbm.10062.
- 1101 Smith, S.M., Jenkinson, M., Woolrich, M.W., Beckmann, C.F., Behrens, T.E.,  
1102 Johansen-Berg, H., Bannister, P.R., Luca, M.D., Drobnjak, I., Flitney,  
1103 D.E., Niazy, R.K., Saunders, J., Vickers, J., Zhang, Y., Stefano, N.D.,  
1104 Brady, J.M., Matthews, P.M., 2004. Advances in functional and struc-  
1105 tural mr image analysis and implementation as fsl. *NeuroImage* 23, S208  
1106 – S219. doi:<https://doi.org/10.1016/j.neuroimage.2004.07.051>. math-  
1107 ematics in Brain Imaging.
- 1108 Smyser, C.D., Dosenbach, N.U., Smyser, T.A., Snyder, A.Z., Rogers, C.E.,  
1109 Inder, T.E., Schlaggar, B.L., Neil, J.J., 2016a. Prediction of brain maturity  
1110 in infants using machine-learning algorithms. *NeuroImage* 136, 1–9. doi:10.  
1111 1016/J.NEUROIMAGE.2016.05.029.
- 1112 Smyser, T.A., Smyser, C.D., Rogers, C.E., Gillespie, S.K., Inder, T.E., Neil, J.J.,  
1113 2016b. Cortical gray and adjacent white matter demonstrate synchronous  
1114 maturation in very preterm infants. *Cerebral Cortex* 26, 3370–3378. doi:10.  
1115 1093/cercor/bhv164.
- 1116 Soussia, M., Reikik, I., 2018. Unsupervised manifold learning using high-order  
1117 morphological brain networks derived from T1-w MRI for autism diagnosis.  
1118 *Frontiers in Neuroinformatics* 12, 70. doi:10.3389/fninf.2018.00070.

- 1119 Sparrow, S., Manning, J.R., Cartier, J., Anblagan, D., Bastin, M.E., Piyasena,  
1120 C., Pataky, R., Moore, E.J., Semple, S.I., Wilkinson, A.G., Evans, M., Drake,  
1121 A.J., Boardman, J.P., 2016. Epigenomic profiling of preterm infants reveals  
1122 DNA methylation differences at sites associated with neural function. *Trans-*  
1123 *lational psychiatry* 6, e716. doi:10.1038/tp.2015.210.
- 1124 Steven, A.J., Zhuo, J., Melhem, E.R., 2014. Diffusion kurtosis imaging: an  
1125 emerging technique for evaluating the microstructural environment of the  
1126 brain. *AJR. American journal of roentgenology* 202 1, W26–33.
- 1127 Tariq, M., Schneider, T., Alexander, D.C., Wheeler-Kingshott, C.A.G., Zhang,  
1128 H., 2016. Bingham-NODDI: Mapping anisotropic orientation dispersion of  
1129 neurites using diffusion MRI. *NeuroImage* 133, 207 – 223. doi:<https://doi.org/10.1016/j.neuroimage.2016.01.046>.
- 1131 Telford, E.J., Cox, S.R., Fletcher-Watson, S., Anblagan, D., Sparrow, S.,  
1132 Pataky, R., Quigley, A., Semple, S.I., Bastin, M.E., Boardman, J.P., 2017.  
1133 A latent measure explains substantial variance in white matter microstruc-  
1134 ture across the newborn human brain. *Brain Structure and Function* 222,  
1135 4023–4033.
- 1136 Thompson, D.K., Chen, J., Beare, R., Adamson, C.L., Ellis, R., Ahmadzai,  
1137 Z.M., Kelly, C.E., Lee, K.J., Zalesky, A., Yang, J.Y., Hunt, R.W., Cheong,  
1138 J.L., Inder, T.E., Doyle, L.W., Seal, M.L., Anderson, P.J., 2016. Structural  
1139 connectivity relates to perinatal factors and functional impairment at 7years  
1140 in children born very preterm. *NeuroImage* 134, 328 – 337. doi:<https://doi.org/10.1016/j.neuroimage.2016.03.070>.
- 1142 Thompson, D.K., Kelly, C.E., Chen, J., Beare, R., Alexander, B., Seal, M.L.,  
1143 Lee, K., Matthews, L.G., Anderson, P.J., Doyle, L.W., Spittle, A.J., Cheong,  
1144 J.L., 2018a. Early life predictors of brain development at term-equivalent  
1145 age in infants born across the gestational age spectrum. *NeuroImage* doi:10.  
1146 1016/j.neuroimage.2018.04.031.

- 1147 Thompson, D.K., Kelly, C.E., Chen, J., Beare, R., Alexander, B., Seal, M.L.,  
1148 Lee, K.J., Matthews, L.G., Anderson, P.J., Doyle, L.W., Cheong, J.L., Spit-  
1149 tle, A.J., 2018b. Characterisation of brain volume and microstructure at  
1150 term-equivalent age in infants born across the gestational age spectrum. *Neu-  
1151 roImage: Clinical* , 101630.
- 1152 Toews, M., Wells, W.M., Zöllei, L., 2012. A feature-based developmental model  
1153 of the infant brain in structural MRI, in: *International Conference on Medical  
1154 Image Computing and Computer-Assisted Intervention*, Springer. pp. 204–  
1155 211.
- 1156 Toulmin, H., Beckmann, C.F., O’Muircheartaigh, J., Ball, G., Nongena, P.,  
1157 Makropoulos, A., Ederies, A., Counsell, S.J., Kennea, N., Arichi, T., Tu-  
1158 sor, N., Rutherford, M.A., Azzopardi, D., Gonzalez-Cinca, N., Hajnal, J.V.,  
1159 Edwards, A.D., 2015. Specialization and integration of functional thalamocor-  
1160 tical connectivity in the human infant. *Proceedings of the National Academy  
1161 of Sciences* 112, 6485–6490.
- 1162 Tournier, J.D., Smith, R.E., Raffelt, D.A., Tabbara, R., Dhollander, T., Pietsch,  
1163 M., Christiaens, D., Jeurissen, B., Yeh, C.H., Connelly, A., 2019. Mrtrix3: A  
1164 fast, flexible and open software framework for medical image processing and  
1165 visualisation. *bioRxiv* doi:10.1101/551739.
- 1166 Tustison, N.J., Avants, B.B., Cook, P.A., Zheng, Y., Egan, A., Yushkevich, P.A.,  
1167 Gee, J.C., 2010. N4ITK: Improved N3 bias correction. *IEEE Transactions on  
1168 Medical Imaging* 29, 1310–1320. doi:10.1109/TMI.2010.2046908.
- 1169 Van Den Heuvel, M.P., Kersbergen, K.J., De Reus, M.A., Keunen, K., et al.,  
1170 2015. The neonatal connectome during preterm brain development. *Cerebral  
1171 Cortex* 25, 3000–3013. doi:10.1093/cercor/bhu095.
- 1172 Van Der Walt, S., Colbert, S.C., Varoquaux, G., 2011. The numpy array:  
1173 a structure for efficient numerical computation. *Computing in Science &  
1174 Engineering* 13, 22.



- 1175 Van Lieshout, R.J., Ferro, M.A., Schmidt, L.A., Boyle, M.H., Saigal, S., Mor-  
1176 rison, K.M., Mathewson, K.J., 2018. Trajectories of psychopathology in ex-  
1177 tremely low birth weight survivors from early adolescence to adulthood: a  
1178 20-year longitudinal study. *Journal of Child Psychology and Psychiatry* 59,  
1179 1192–1200.
- 1180 Varoquaux, G., 2018. Cross-validation failure: small sample sizes lead to large  
1181 error bars. *Neuroimage* 180, 68–77.
- 1182 Varoquaux, G., Raamana, P.R., Engemann, D.A., Hoyos-Idrobo, A., Schwartz,  
1183 Y., Thirion, B., 2017. Assessing and tuning brain decoders: cross-validation,  
1184 caveats, and guidelines. *NeuroImage* 145, 166–179.
- 1185 Veraart, J., Fieremans, E., Novikov, D.S., 2016. Diffusion MRI noise mapping  
1186 using random matrix theory. *Magnetic Resonance in Medicine* 76, 1582–1593.  
1187 doi:10.1002/mrm.26059.
- 1188 Veraart, J., Novikov, D.S., Christiaens, D., Ades-aron, B., Sijbers, J., Fiere-  
1189 mans, E., 2016b. Denoising of diffusion MRI using random matrix theory.  
1190 *NeuroImage* 142, 394–406. doi:10.1016/j.neuroimage.2016.08.016.
- 1191 Weiskopf, N., Suckling, J., Williams, G., Correia, M.M., Inkster, B., Tait, R.,  
1192 Ooi, C., Bullmore, E.T., Lutti, A., 2013. Quantitative multi-parameter map-  
1193 ping of R1, PD\*, MT, and R2\* at 3T: a multi-center validation. *Frontiers in*  
1194 *Neuroscience* 7. doi:10.3389/fnins.2013.00095.
- 1195 Woodward, L.J., Anderson, P.J., Austin, N.C., Howard, K., Inder, T.E., 2006.  
1196 Neonatal mri to predict neurodevelopmental outcomes in preterm infants.  
1197 *New England Journal of Medicine* 355, 685–694.
- 1198 Wu, Z., Li, G., Shen, D., Hu, D., Lin, W., 2019. Hierarchical rough-to-fine  
1199 model for infant age prediction based on cortical features. *IEEE Journal of*  
1200 *Biomedical and Health Informatics* , 1–1doi:10.1109/jbhi.2019.2897020.

- 1201 Yap, P.T., Fan, Y., Chen, Y., Gilmore, J.H., Lin, W., Shen, D., 2011. Develop-  
1202 ment trends of white matter connectivity in the first years of life. PLoS ONE  
1203 6, e24678. doi:10.1371/journal.pone.0024678.
- 1204 Zhang, H., Schneider, T., Wheeler-Kingshott, C.A., Alexander, D.C., 2012.  
1205 NODDI: Practical in vivo neurite orientation dispersion and density imaging  
1206 of the human brain. NeuroImage 61, 1000–1016. doi:10.1016/j.neuroimage.  
1207 2012.03.072.
- 1208 Zou, H., Hastie, T., 2005. Regularization and variable selection via the elastic  
1209 net. Journal of the Royal Statistical Society: Series B (Statistical Methodol-  
1210 ogy) 67, 301–320.
